# Supplementary material for: Voluntary sustainability standards can mitigate deforestation-export trade-offs
Source: Research Square preprint supplement (doi:10.21203/rs.3.rs-7713081/v1), 2025-10-14
Supplement: Supplementary file 1 [file ae976fc7567e1625558fef7e.xlsx]

## Sheet: Metadata
Manuscript	Voluntary sustainability standards can mitigate deforestation-export trade-offs
Authors	Eva Boonaert, Janne Bemelmans, U. Martin Persson, Miet Maertens
Sheet	Description
Documents	Theory, existing comparisons and benchmarking schemes
Scoring	Individual indicators guided by theory and existing comparisons and benchmarking schemes
Weighting	Weighting scheme
Results	Substantive stringency scores
Final results	Restructuring of the results for R
Restructured results	Restructuring of the results for the factor analysing in R

## Sheet: Documents
Sources used to define the criteria
the ITC Standards Map
the GIZ Sustainability Standards Comparison Tool
https://www.sciencedirect.com/science/article/pii/S1389934124000893
https://www.wwf.de/fileadmin/fm-wwf/Publikationen-PDF/Amazonas/Setting-the-new-Bar-for-Conversion-free-Soy-in-Europe.pdf
https://www.iisd.org/system/files/2021-10/voluntary-sustainability-standards-forest-conservation-trade-policy.pdf
WWF Certification Assessment Tool (CAT)
https://www.oecd.org/en/publications/understanding-sustainability-initiatives_8f8a3d7f-en.html
ISCC Global Social Compliance Programme
SSCI Benchmarking on Environmental Sustainability

## Sheet: Scoring
Topic	Attribute name	Scoring guidance	Score	Relevance	Include in narrow or broad indicator
Deforestation prevention	Prohibition of secondary or natural forest conversion	Conversion allowed or not mentioned	0	Conversion prohibition is central to deforestation reduction	Narrow
		Conversion prohibited but with exemptions (e.g., smallholder allowances, legal mandates)	0.5
		Conversion prohibited without exemptions	1
	Prohibition of primary forest conversion	Conversion allowed or not mentioned	0	Conversion prohibition is central to deforestation reduction	Narrow
		Conversion prohibited but with exemptions (e.g., smallholder allowances, legal mandates)	0.5
		Conversion prohibited without exemptions	1
	Prohibition of production in High Conservation Value (HCV) or High Carbon Stock (HCS) areas	No prohibition or not mentioned	0	Highly relevant due to their critical ecological functions	Narrow
		Conversion is prohibited with exemptions (e.g., smallholder allowances, legal mandates)	0.5
		Conversion is prohibited without exemptions	1
	Prohibition of production in protected areas	No prohibition or not mentioned	0	Crucial to respect existing legal protections	Narrow
		Conversion is prohibited with exemptions (e.g., smallholder allowances, legal mandates)	0.5
		Conversion is prohibited without exemptions	1
	Criteria including a cut-off date to prohibit deforestation	No		Might imply a more stringent prohibition of forest conversion	Broad
		Yes	1
	Clear definition of forest types that may not be converted	No	0	Without definitions, criteria risk inconsistency	Narrow
		Yes, but not aligned with internationally accepted definitions (e.g., FAO or IPCC)	0.5
		Yes, aligned with internationally accepted definitions (e.g., FAO or IPCC)	1
	Criteria to ensure adherence to national conventions and legislation on deforestation	No	0	Vital to ensure enforcement with national standards and best practices	Narrow
		Yes	1
Conservation and restoration of natural ecosystems	Environmental impact assessment for new and/or existing production	No impact assessments required	0	Necessary for accountability	Broad
		Yes	1
	Enhance conservation of natural ecosystems	No	0	Important for reversing deforestation trends	Broad
		Yes	1
	Restoration of negative impact from production activities on the natural ecosystem	No	0	Important for reversing deforestation trends	Broad
		Yes	1
Location and land rights	Delineation of farm boundaries	No requirement	0	Very important for traceability and accountability	Narrow
		Partial delineation (e.g., GPS points per producer)	0.5
		Full delineation (e.g., polygons for all certified plots)	1
	Land title and legal use rights	No requirement	0	Foundational for resolving disputes and preventing land grabs	Broad
		Requirements include dispute resolution measures	1
	Protection on local and indigenous rights	No	0	Key to reducing social conflict and ensuring equitable outcomes	Broad
		Yes	1
Sustainable land use practices	Promotion of agroforestry	No requirement	0	Encourages sustainable production practices, and might improve forest conservation	Broad

## Sheet: Weighting
	Explicitness
Criticality	Implicit	Explicit
Not covered	0	0
Optional	0.25	0.5
Minor	0.5	0.75
Major	0.75	1

## Sheet: Results
VSS		RA
Standard version		2010					2017					2020
Topic	Attribute name	DS score	Criticality	Explicitness	Excerpt	Final score	DS score	Criticality	Explicitness	Excerpt	Final score	DS score	Criticality	Explicitness	Excerpt	Final score
Deforestation Prevention	Prohibition of secondary or natural forest conversion	1	0.75	0.25	2.2 (critical criterion): From the date of application for certification onwards, the farm must not destroy any natural ecosystem.	1	1	0.75	0.25	2.2 (critical criterion): Farms conserve all natural ecosystems and have not destroyed forest or other natural ecosystems in the five-year period prior to the date of initial application for Rainforest Alliance certification or after January 1, 2014, whichever date is earlier.	1	0.5	0.75	0.25	6.1.1 (core requirement for group certification of small and large farms, and for individual certification): From January 1st 2014 onward, natural forests and other natural ecosystems have not been converted into agricultural production or other land uses. However, for the management of infrastructure and for minor cases of deforestation or conversion that can be remediated, some flexibility is p…	0.5
	Prohibition of primary forest conversion	1	0.75	0.25	2.2 (critical criterion): From the date of application for certification onwards, the farm must not destroy any natural ecosystem.	1	1	0.75	0.25	2.2 (critical criterion): Farms conserve all natural ecosystems and have not destroyed forest or other natural ecosystems in the five-year period prior to the date of initial application for Rainforest Alliance certification or after January 1, 2014, whichever date is earlier.	1	0.5	0.75	0.25	6.1.1 (core requirement for group certification of small and large farms, and for individual certification): From January 1st 2014 onward, natural forests and other natural ecosystems have not been converted into agricultural production or other land uses. However, for the management of infrastructure and for minor cases of deforestation or conversion that can be remediated, some flexibility is p…	0.5
	Prohibition of production in HCV or HCS areas	1	0.75	0.25	2.2 (critical criterion): From November 1, 2005 onwards no high value ecosystems must have been destroyed by or due to purposeful farm management activities.	1	1	0.75	0.25	2.1 (critical criterion): High Conservation Value (HCV) areas have not been destroyed from November 1, 2005 onward.	1	0.5	0.75	0	6.1.3 & 4 (core requirement for group certification of small and large farms, and for individual certification): Management includes the mitigation measures from the Farm Risk Assessment Tool in 1.3.1 with regard to High Conservation Values in the Management Plan (1.3.2). Management implements these measures (see Annex 3).	0.375
	Prohibition of production in protected areas	0	0	0	Protected area is in the glossary but not exactly mentioned in the criteria	0	1	0.75	0.25	2.3 (critical criterion): Production activities do not degrade any protected area.	1	0.5	0.75	0.25	6.1.2 (core requirement for group certification of small and large farms, and for individual certification): Production or processing does not occur in protected areas or their officially designated buffer zones, except where it complies with applicable law.	0.5
	Criteria including a cut-off date to prohibit deforestation	1	0.75	0	2.2 (critical criterion): From the date of application for certification onwards, the farm must not destroy any natural ecosystem. Additionally, from November 1, 2005 onwards no high value ecosystems must have been destroyed by or due to purposeful farm management activities. If any natural ecosystems have been destroyed by or due to purposeful farm management activities between November 1, 1999 …	0.75	1	0.75	0.25	2.2 (critical criterion): Farms conserve all natural ecosystems and have not destroyed forest or other natural ecosystems in the five-year period prior to the date of initial application for Rainforest Alliance certification or after January 1, 2014, whichever date is earlier.	1	1	0.75	0.25	6.1.1 (core requirement for group certification of small and large farms, and for individual certification): From January 1st 2014 onward, natural forests and other natural ecosystems have not been converted into agricultural production or other land uses. However, for the management of infrastructure and for minor cases of deforestation or conversion that can be remediated, some flexibility is p…	1
	Clear definition of forest types that may not be converted	1	0	1	Natural ecosystems: A dynamic complex of plant, animal and micro-organism communities and their non-living environment interacting as a functional unit (Source: Convention on Biological Diversity). Examples are aquatic ecosystems, such as streams, rivers, pools, ponds, lakes, lagoons, and other bodies of liquid water that exist naturally; wetlands such as swamps, marshes, mangroves or bogs; terre…	1	1	0	1	Natural ecosystem: Ecosystems that resemble – in terms of species composition, structure, and function – those that are or would be found in a given area in the absence of significant human management impacts, including aquatic ecosystems, forests and other native terrestrial ecosystems. Forests: Forests include both humid forests (rainforest) and drier forests; lowland, montane, and cloud forest…	1	1	0	1	Natural ecosystem: An ecosystem that substantially resembles – in terms of species composition, structure, and ecological function – one that is or would be found in a given area in the absence of major human impacts. This includes human-managed ecosystems where much of the natural species composition, structure, and ecological function are present. Natural ecosystems include all-natural terrestr…	1
	Criteria to ensure adherence to national conventions and legislation on deforestation	1	0.5	0.25	1.1: The farm must have a social and environmental management system according to its size and complexity of its operations that contains the necessary policies, programs and procedures that prove compliance with this standard and respective national legislation binding for social, labor and environmental aspects on farms – whichever is stricter.	0.75	1	0.75	0.25	1.6 (critical criterion): The farm management and group administrator demonstrate commitment to certification and to complying with this standard: a) Resources are dedicated and responsible personnel is designated to the development and implementation of social and environmental management plans; b) Applicable laws are identified within the scope of this standard, systems for compliance are maint…	1	1	0.75	0.25	1.2.1 (core requirement for group certification of small and large farms, and for individual certification): Management complies with applicable laws and collective bargaining agreements (CBA) within the scope of the Rainforest Alliance Sustainable Agriculture Standard. In the case that an applicable law or CBA is stricter than a criterion in the standard, such law or CBA will prevail unless such…	1
Conservation and restoration of natural ecosystems	Environmental impact assessment for production activities	1	0.5	0.25	1.6: The potential social and environmental impacts of new works or activities must be evaluated. These include the expansion of production areas, the construction or installation of new infrastructure, or major changes in production or processing systems. The evaluation must be carried out before the initiation of any changes or new work in accordance with applicable laws or, in their absence, b…	0.75	1	0.75	0.25	1.4 (critical criterion): An independent environmental and social impact assessment (ESIA) is conducted prior to land conversion or the development or expansion of farm infrastructure when required by applicable law or when these proposed changes will exceed Rainforest Alliance ESIA parameters. The ESIA includes written plans and procedures for minimizing and mitigating any negative impacts and e…	1	1	0.75	0.25	6.2.1 (core requirement for group certification of large farms by group management, and for individual certification): Management develops and implements a plan to conserve natural ecosystems. The plan is based on the map required in 1.2.9 and the natural ecosystems section of the Risk Assessment Tool in 1.3.1 and is updated annually (see Annex 3 and Guidance Document on natural ecosystems and ve…	1
	Criteria to enhance conservation of natural ecosystems	1	0.75	0.25	2.2 (critical criterion): From the date of application for certification onwards, the farm must not destroy any natural ecosystem. 2.1 (critical criterion): All existing natural ecosystems, both aquatic and terrestrial, must be identified, protected and restored through a conservation program. The program must include the restoration of natural ecosystems or the reforestation of areas within the …	1	1	0.75	0.25	2.2 (critical criterion): Farms conserve all natural ecosystems and have not destroyed forest or other natural ecosystems in the five-year period prior to the date of initial application for Rainforest Alliance certification or after January 1, 2014, whichever date is earlier.	1	1	0.75	0.25	6.2.1 (core requirement for group certification of large farms by group management, and for individual certification): Management develops and implements a plan to conserve natural ecosystems. The plan is based on the map required in 1.2.9 and the natural ecosystems section of the Risk Assessment Tool in 1.3.1 and is updated annually (see Annex 3 and Guidance Document on natural ecosystems and ve…	1
	Criteria on restoration of negative impact from production activities on the natural ecosystem	1	0.75	0.25	2.1 (critical criterion): All existing natural ecosystems, both aquatic and terrestrial, must be identified, protected and restored through a conservation program. The program must include the restoration of natural ecosystems or the reforestation of areas within the farm that are unsuitable for agriculture.	1	1	0.5	0.25	2.6 (continuous improvement criterion level C): The farm management and group administrator develop a map that includes natural ecosystems and agroforestry canopy cover or border plantings with estimated vegetation coverage and estimated percentage of native species composition. If the farm or group of member farms have less than 10% total native vegetation cover or less than 15% total native veg…	0.75	1	0.5	0.25	6.2.3 (mandatory smart meter requirement for all): Producers maintain and management monitors natural vegetation cover and reports annually on the indicator (% of total farm area under natural vegetation cover) from year one onwards. If there is less than 10% of the total area under natural vegetation cover or less than 15% for farms growing shade-tolerant crops, management sets targets and takes…	0.75
Location and land rights	Delineation of farm boundaries	0	0	0		0	1	0.75	0.25	1.1 (critical criterion): A farm baseline assessment is conducted and documented. The assessment is reviewed and updated at least once per year. The assessment includes: • A farm map indicating the location of each production plot, roads, buildings, other infrastructure, natural ecosystems, and abutting land uses including protected areas; • A boundary delineation of the certificate’s geographic …	1	0.5	0.75	0.25	1.2.10 (core requirement for group certification of large farms or group management, and for individual certification): An up to date map of the farm (large farms) or the farm area (group of small farms) is available, including: 1.2.11 (core requirement for group certification of small farms): A sketch of the farm is available. 1.2.12 (core requirement for group certification by group management)…	0.5
	Land title and legal use rights	1	0.5	0.25	7.6 The farm must have a legitimate right to land use and tenure, demonstrated by presenting the appropriate official documentation. If there is no such documentation the farm must show either: a. The absence of significant disputes on land use, tenure and access, or; b. The consent of local communities, regarding the land, natural and agricultural resources.	0.75	1	0.75	0.25	4.19 (critical criterion): Legitimate right to use the land is demonstrated by ownership, leasehold, or other legal documents or by documentation of traditional or community use rights. Right to use the land is not legitimately disputed by current or former local residents or communities, including in relation to past dispossession or forced abandonment. In the event of land conflict, legitimate …	1	1	0.75	0.25	5.8.2 (core requirement for group certification of small and large farms, and for individual certification): The producer has legal and legitimate right to use the land. Upon request, this right is substantiated by ownership, leasehold, or other legal documents or by documentation of traditional or customary use rights. In the event that indigenous peoples and local communities, current or former…	1
	Criteria on the protection of local and indigenous rights	0	0	0		0	1	0.75	0.25	4.20 (critial criterion but not applicable to smallholders): Activities diminishing the land or resource use rights or collective interests of communities are conducted only after having received the communities’ free, prior and informed consent (FPIC). The farm management and group administrator implement complaints or grievance mechanisms to protect community members’ rights. If the farm manage…	1	1	0.75	0.25	5.8.1 (core requirement of group certification of large farms, and individual certification): Management respects legal and customary rights of indigenous peoples and local communities. Activities diminishing the land or resource use rights or collective interests of indigenous peoples and local communities, including High Conservation Values (HCVs) 5 or 6, are conducted only after having receive…	1
Sustainable land use practices	Criteria to promote agroforestry	1	0.5	0.25	2.8: Farms with agroforestry crops located in areas where the original natural vegetative cover is forest must establish and maintain a permanent agroforestry system distributed homogenously throughout the plantations. The agroforestry system’s structure must meet the following requirements: a) The tree community on the cultivated land consists of minimum 12 native species per hectare on average.…	0.75	1	0.5	0.25	2.9 (continuous improvement criterion level A): Farms with shade-tolerant crops have at least 15% total native vegetation coverage across the farm or group of farms or a shade canopy fulfilling the Rainforest Alliance canopy cover and species diversity parameters (i.e., minimum canopy cover of 20-40% and minimum number of native tree species per hectare of 5-12 depending on the commodity and regi…	0.75	1	0.75	0.25	6.2.5 (self-selected smart meter requirement for group certification of small and large farms, and for individual certification): Farms with shade-tolerant crops work towards agroforestry systems with optimal shade coverage and species diversity according to the shade coverage and species diversity reference parameters (i.e., minimum canopy cover of 20-40% and minimum number of native tree specie…	1
					Average:	0.696429				Average:	0.964286				Average:	0.794643
VSS		RSPO principles and criteria															RSPO independent smallholder standard
Standard version		2007					2013					2018					2018
Topic	Attribute name	DS score	Criticality	Explicitness	Excerpt	Final score	DS score	Criticality	Explicitness	Excerpt	Final score	DS score	Criticality	Explicitness	Excerpt	Final score	Score	Criticality	Explicitness	Excerpt	Final score
Deforestation Prevention	Prohibition of secondary or natural forest conversion	0	0	0		0	0	0	0		0	0	0	0		0	0	0	0		0
	Prohibition of primary forest conversion	1	0.75	0.25	7.3: New plantings since November 2005 have not replaced primary forest or any area required to maintain or enhance one or more High Conservation Values (HCVs). • 7.3.2: A comprehensive HCV assessment, including stakeholder consultation, shall be conducted prior to any conversion or new planting. • 7.3.3: Dates of land preparation and commencement shall be recorded.	1	1	0.75	0.25	7.3: Additions to the 2007 version: • 7.3.1 (major): There shall be evidence that no new plantings have replaced primary forest, or any area required to maintain or enhance one or more High Conservation Values (HCVs), since November 2005. New plantings shall be planned and managed to best ensure the HCVs identified are maintained and/or enhanced (see Criterion 5.2). • 7.3.2 (major): … This shall …	1	1	0.75	0.25	7.12 Land clearing does not cause deforestation or damage any area required to protect or enhance High Conservation Values (HCVs) or High Carbon Stock (HCS) forest. HCVs and HCS forests in the managed area are identified and protected or enhanced. • 7.12.1 Land clearing since November 2005 has not damaged primary forest or any area required to protect or enhance HCVs. Land clearing since 15 Novem…	1	0.5	0.75	0	Only mentioned in the smallholder declaration, not a specific requirement	0.375
	Prohibition of production in HCV or HCS areas	1	0.75	0.25	7.3: New plantings since November 2005 have not replaced primary forest or any area required to maintain or enhance one or more High Conservation Values (HCVs). • 7.3.2: A comprehensive HCV assessment, including stakeholder consultation, shall be conducted prior to any conversion or new planting. • 7.3.3: Dates of land preparation and commencement shall be recorded.	1	1	0.75	0.25	7.3: Additions to the 2007 version: • 7.3.1 (major): There shall be evidence that no new plantings have replaced primary forest, or any area required to maintain or enhance one or more High Conservation Values (HCVs), since November 2005. New plantings shall be planned and managed to best ensure the HCVs identified are maintained and/or enhanced (see Criterion 5.2). • 7.3.2 (major): … This shall …	1	1	0.75	0.25	7.12 Land clearing does not cause deforestation or damage any area required to protect or enhance High Conservation Values (HCVs) or High Carbon Stock (HCS) forest. HCVs and HCS forests in the managed area are identified and protected or enhanced. • 7.12.1 Land clearing since November 2005 has not damaged primary forest or any area required to protect or enhance HCVs. Land clearing since 15 Novem…	1	1	0.75	0.25	4.1: High Conservation Values (HCVs) on the smallholder plot or within the managed area and High Carbon Stock (HCS) forests identified after November 2019 using the simplified combined HCV-HCS approach, are managed to ensure that they are maintained and/or enhanced. • E: Smallholders commit to protect HCVs and HCS forests through the precautionary practices approach (reference 1.1 E, Annex 2). • …	1
	Prohibition of production in protected areas	1	0.75	0	5.2: The status of rare, threatened or endangered species and high conservation value habitats, if any, that exist in the plantaion or that could be affected by plantation or mill management, shall be identified and their conservation taken into account in management plans and operations. Information should be collated that includes both the planted area itself and relevant wider landscape-level …	0.75	1	0.75	0	5.2: The status of rare, threatened or endangered species and high conservation value habitats, if any, that exist in the plantation or that could be affected by plantation or mill management, shall be identified and their conservation taken into account in management plans and operations. Information should be collated that includes both the planted area itself and relevant wider landscape-level…	0.75	0	0	0		0	1	0.75	0.25	2.4: Smallholder plots are located outside of areas classified as national parks or protected areas, as defined by national, regional or local law, or as specified in National Interpretations. • E: Smallholder plots are located outside of areas classified as national parks or protected areas as defined by national, regional or local law, or as specified in National Interpretations (Reference 1.1 …	1
	Criteria including a cut-off date to prohibit deforestation	1	0.75	0.25	7.3: New plantings since November 2005 have not replaced primary forest or any area required to maintain or enhance one or more High Conservation Values (HCVs). • 7.3.2: A comprehensive HCV assessment, including stakeholder consultation, shall be conducted prior to any conversion or new planting. • 7.3.3: Dates of land preparation and commencement shall be recorded.	1	1	0.75	0.25	7.3: Additions to the 2007 version: • 7.3.1 (major): There shall be evidence that no new plantings have replaced primary forest, or any area required to maintain or enhance one or more High Conservation Values (HCVs), since November 2005. New plantings shall be planned and managed to best ensure the HCVs identified are maintained and/or enhanced (see Criterion 5.2). • 7.3.2 (major): … This shall …	1	1	0.75	0.25	7.12 Land clearing does not cause deforestation or damage any area required to protect or enhance High Conservation Values (HCVs) or High Carbon Stock (HCS) forest. HCVs and HCS forests in the managed area are identified and protected or enhanced. • 7.12.1 Land clearing since November 2005 has not damaged primary forest or any area required to protect or enhance HCVs. Land clearing since 15 Novem…	1	1	0.75	0.25	4.1: High Conservation Values (HCVs) on the smallholder plot or within the managed area and High Carbon Stock (HCS) forests identified after November 2019 using the simplified combined HCV-HCS approach, are managed to ensure that they are maintained and/or enhanced. • E: Smallholders commit to protect HCVs and HCS forests through the precautionary practices approach (reference 1.1 E, Annex 2). • …	1
	Clear definition of forest types that may not be converted	1	0	1	High Conservation Value Forest (HCVF): The forest necessary to maintain or enhance one or more High Conservation Values (HCVs) (See: ‘The HCVF Toolkit’ – available from www.hcvnetwork.org): • HCV1. Forest areas containing globally, regionally or nationally significant concentrations of biodiversity values (e.g. endemism, endangered species). • HCV2. Forest areas containing globally, regionally or…	1	1	0	1	High Conservation Value (HCV) areas: The areas necessary to maintain or enhance one or more High Conservation Values (HCVs) (High Conservation Value Resource Network (HCVRN) Common Guidance for Identification of HCVs 2017): • HCV 1 – Species diversity; concentrations of biological diversity including endemic species, and rare, threatened and endangered (RTE) species, that are significant at globa…	1	1	0	0.75	Deforestation: Loss of natural forest as a result of: i) conversion to agriculture or other non-forest land use; ii) conversion to a plantation forest; or iii) severe and sustained degradation (Draft Accountability Framework Initiative (AFI) (July 2018). Refer to latest AFI definition). High Carbon Stock (HCS) forest: Forests that have been identified using the High Carbon Stock Approach (HCSA) T…	0.75	1	0	1	High Carbon Stock (HCS) forest: Forests that have been identified using the High Carbon Stock Approach (HCSA) Toolkit (HCSA website www.highcarbonstock.org) High Conservation Value (HCV) areas: The areas necessary to maintain or enhance one or more High Conservation Values (HCVs) (High Conservation Value Resource Network (HCVRN) Common Guidance for Identification of HCVs 2017): • HCV 1 – Species …	1
	Criteria to ensure adherence to national conventions and legislation on deforestation	1	0.75	0.25	2.1: There is compliance with all applicable local, national and ratified international laws and regulations.	1	1	0.75	0.25	2.1: There is compliance with all applicable local, national and ratified international laws and regulations.	1	1	0.75	0.25	2.1: There is compliance with all applicable local, national, and ratified international laws and regulations.	1	1	0.75	0.25	2.1: There is compliance with all applicable local, national and ratified international laws and regulations.	1
Conservation and restoration of natural ecosystems	Environmental impact assessment for production activities	1	0.75	0.25	5.1: Aspects of plantation and mill management, including replanting, that have environmental impacts are identified, and plans to mitigate the negative impacts and promote the positive ones are made, implemented and monitored, to demonstrate continuous improvement. • 5.1.1: An impact assessment (EIA) shall be documented. • 5.2.2: Where the identification of impacts requires changes in current pr…	1	1	0.75	0.25	5.1: Aspects of plantation and mill management, including replanting, that have environmental impacts are identified, and plans to mitigate the negative impacts and promote the positive ones are made, implemented and monitored, to demonstrate continuous improvement. • 5.1.1: An environmental impact assessment (EIA) shall be documented. • 5.2.2: Where the identification of impacts requires changes…	1	1	0.75	0.25	3.2: similar to criterion 8.1 in the 2007 version: The unit of certification regularly monitors and reviews their economic, social and environmental performance and develops and implements action plans that allow demonstrable continuous improvement in key operations. • 3.2.1 (critical): The action plan for continuous improvement is implemented, based on consideration of the main social and enviro…	1	1	0.75	0.25	3.2: similar to criterion 8.1 in the 2007 version: The unit of certification regularly monitors and reviews their economic, social and environmental performance and develops and implements action plans that allow demonstrable continuous improvement in key operations. • 3.2.1 (critical): The action plan for continuous improvement is implemented, based on consideration of the main social and enviro…	1
	Criteria to enhance conservation of natural ecosystems	1	0.75	0	5.1: Aspects of plantation and mill management, including replanting, that have environmental impacts are identified, and plans to mitigate the negative impacts and promote the positive ones are made, implemented and monitored, to demonstrate continuous improvement. • 5.1.1: Documented impact assessment. • 5.2.2: Where the identification of impacts requires changes in current practices, in order …	0.75	1	0.75	0	5.1: Aspects of plantation and mill management, including replanting, that have environmental impacts are identified, and plans to mitigate the negative impacts and promote the positive ones are made, implemented and monitored, to demonstrate continuous improvement. • 5.1.1: An impact assessment (EIA) shall be documented. • 5.2.2: Where the identification of impacts requires changes in current pr…	0.75	1	0.75	0.25	3.2: similar to criterion 8.1 in the 2007 version: The unit of certification regularly monitors and reviews their economic, social and environmental performance and develops and implements action plans that allow demonstrable continuous improvement in key operations. • 3.2.1 (critical): The action plan for continuous improvement is implemented, based on consideration of the main social and enviro…	1	1	0.75	0.25	3.2: similar to criterion 8.1 in the 2007 version: The unit of certification regularly monitors and reviews their economic, social and environmental performance and develops and implements action plans that allow demonstrable continuous improvement in key operations. • 3.2.1 (critical): The action plan for continuous improvement is implemented, based on consideration of the main social and enviro…	1
	Criteria on restoration of negative impact from production activities on the natural ecosystem	1	0.75	0.25	5.1: Aspects of plantation and mill management, including replanting, that have environmental impacts are identified, and plans to mitigate the negative impacts and promote the positive ones are made, implemented and monitored, to demonstrate continuous improvement. • 5.1.1: An impact assessment (EIA) shall be documented. • 5.2.2: Where the identification of impacts requires changes in current pr…	1	1	0.75	0.25	5.1: Aspects of plantation and mill management, including replanting, that have environmental impacts are identified, and plans to mitigate the negative impacts and promote the positive ones are made, implemented and monitored, to demonstrate continuous improvement. • 5.1.1: An impact assessment (EIA) shall be documented. • 5.2.2: Where the identification of impacts requires changes in current pr…	1	1	0.75	0	3.2: similar to criterion 8.1 in the 2007 version: The unit of certification regularly monitors and reviews their economic, social and environmental performance and develops and implements action plans that allow demonstrable continuous improvement in key operations. • 3.2.1 (critical): The action plan for continuous improvement is implemented, based on consideration of the main social and enviro…	0.75	1	0.75	0.25	3.2: similar to criterion 8.1 in the 2007 version: The unit of certification regularly monitors and reviews their economic, social and environmental performance and develops and implements action plans that allow demonstrable continuous improvement in key operations. • 3.2.1 (critical): The action plan for continuous improvement is implemented, based on consideration of the main social and enviro…	1
Location and land rights	Delineation of farm boundaries	1	0.75	0.25	2.2: The right to use the land can be demonstrated, and is not legitimately contested by local communities with demonstrable rights. • 2.2.1: Documents showing legal ownership or lease, history of land tenure and the actual legal use of the land. • 2.2.2: Evidence that legal boundaries are clearly demarcated and visibly maintained. • 2.2.3: Where there are, or have been, disputes, additional proo…	1	1	0.75	0.25	2.2: The right to use the land can be demonstrated, and is not legitimately contested by local communities with demonstrable rights. • 2.2.1: Documents showing legal ownership or lease, history of land tenure and the actual legal use of the land. • 2.2.2: Evidence that legal boundaries are clearly demarcated and visibly maintained. • 2.2.3: Where there are, or have been, disputes, additional proo…	1	1	0.75	0.25	4.4: similar to criterion 2.3 of the 2007 version: Use of the land for oil palm does not diminish the legal, customary or user rights of other users without their Free, Prior and Informed Consent. • 4.4.1 (critical): Documents showing legal ownership or lease, or authorized use of customary land authorized by customary landowners through a Free, Prior and Informed (FPIC) process. Documents relate…	1	1	0.75	0.25	2.1.3: Legal or authorised boundaries are clearly demarcated and visibly maintained, and there is no planting beyond these legal or authorised boundaries.	1
	Land title and legal use rights	1	0.75	0.25	2.2: The right to use the land can be demonstrated, and is not legitimately contested by local communities with demonstrable rights. • 2.2.1: Documents showing legal ownership or lease, history of land tenure and the actual legal use of the land. • 2.2.2: Evidence that legal boundaries are clearly demarcated and visibly maintained. • 2.2.3: Where there are, or have been, disputes, additional proo…	1	1	0.75	0.25	2.2: The right to use the land can be demonstrated, and is not legitimately contested by local communities with demonstrable rights. • 2.2.1: Documents showing legal ownership or lease, history of land tenure and the actual legal use of the land. • 2.2.2: Evidence that legal boundaries are clearly demarcated and visibly maintained. • 2.2.3: Where there are, or have been, disputes, additional proo…	1	1	0.75	0.25	4.4: similar to criterion 2.3 of the 2007 version: Use of the land for oil palm does not diminish the legal, customary or user rights of other users without their Free, Prior and Informed Consent. • 4.4.1 (critical): Documents showing legal ownership or lease, or authorized use of customary land authorized by customary landowners through a Free, Prior and Informed (FPIC) process. Documents relate…	1	1	0.75	0.25	2.1: Smallholders have legal or customary rights to use the land in accordance with national and local laws, and customary practices. • E: Smallholders provide the coordinates or maps of their plots and evidence of ownership, or rights to use the land. (reference Indicator 1.1 E, Annex 2) • MS A: Smallholders can demonstrate legal ownership or native and/or customary rights to use the land or dem…	1
	Criteria on the protection of local and indigenous rights	1	0.75	0.25	2.3: Use of the land for oil palm does not diminish the legal rights, or customary rights, of other users, without their free, prior and informed consent • 2.3.1: Maps of an appropriate scale showing the extent of recognized legal, customary or user rights (Criteria 2.2, 7.5 and 7.6) shall be developed • 2.3.2: Copies of negotiated agreements detailing the process of free, prior and informed cons…	1	1	0.75	0.25	2.3: Use of the land for oil palm does not diminish the legal rights, or customary rights, of other users, without their free, prior and informed consent • 2.3.1: Maps of an appropriate scale showing the extent of recognized legal, customary or user rights (Criteria 2.2, 7.5 and 7.6) shall be developed • 2.3.2: Copies of negotiated agreements detailing the process of free, prior and informed cons…	1	1	0.75	0.25	4.4: similar to criterion 2.3 of the 2007 version: Use of the land for oil palm does not diminish the legal, customary or user rights of other users without their Free, Prior and Informed Consent. • 4.4.1 (critical): Documents showing legal ownership or lease, or authorized use of customary land authorized by customary landowners through a Free, Prior and Informed (FPIC) process. Documents relate…	1	1	0.75	0.25	2.1: Smallholders have legal or customary rights to use the land in accordance with national and local laws, and customary practices. • E: Smallholders provide the coordinates or maps of their plots and evidence of ownership, or rights to use the land. (reference Indicator 1.1 E, Annex 2) • MS A: Smallholders can demonstrate legal ownership or native and/or customary rights to use the land or dem…	1
Sustainable land use practices	Criteria to promote agroforestry	0	0	0		0	0	0	0		0	0	0	0		0	0	0	0		0
					Average:	0.821429				Average:	0.821429				Average:	0.75				Average:	0.8125
VSS		Fairtrade International standard for small-scale producer organizations										Fairtrade International standard for contract production					Fairtrade International standard for hired labor
Standard version		2011					2019					2011					2011					2014
Topic	Attribute name	DS score	Criticality	Explicitness	Excerpt	Final score	DS score	Criticality	Explicitness	Excerpt	Final score	DS score	Criticality	Explicitness	Excerpt	Final score	DS score	Criticality	Explicitness	Excerpt	Final score	DS score	Criticality	Explicitness	Excerpt	Final score
Deforestation Prevention	Prohibition of secondary or natural forest conversion	0	0	0		0	1	0.75	0	3.2.31 (new as of 2019 to make more explicit reference to deforestation, core from year 0 onwards): Your members do not cause deforestation and do not destroy vegetation in carbon storage ecosystems or protected areas. 3.2.32 (new as of 2019, core from year 1 onwards): You have a procedure in place to ensure that your members do not cause deforestation or degradation of vegetation. The procedure …	0.75	0	0	0		0	0	0	0		0	0	0	0		0
	Prohibition of primary forest conversion	0	0	0		0	1	0.75	0	3.2.31 (new as of 2019 to make more explicit reference to deforestation, core from year 0 onwards): Your members do not cause deforestation and do not destroy vegetation in carbon storage ecosystems or protected areas. 3.2.32 (new as of 2019, core from year 1 onwards): You have a procedure in place to ensure that your members do not cause deforestation or degradation of vegetation. The procedure …	0.75	0	0	0		0	0	0	0		0	0	0	0		0
	Prohibition of production in HCV or HCS areas	1	0.75	0	3.2.33 (core from year 0 onwards): Your members must avoid negative impacts on protected areas and in areas with high conservation value within or outside the farm or production areas from the date of application of certification. The areas that are used or converted to production of the Fairtrade crop must comply with national legislation in relation to agricultural land use.	0.75	1	0.75	0	3.2.30 (core from year 0 onwards): Your members avoid negative impacts on protected areas and in areas with high conservation value within or outside the farm or production areas. The areas that are used or converted to production of the Fairtrade crop comply with national legislation in relation to agricultural land use.	0.75	1	0.75	0	B3.1.13 (core from year 0 onwards): You must avoid negative impacts on protected areas and in areas with high conservation value within or outside the farm or production areas or from the date of application for certification. The areas that are used or converted to production of the Fairtrade crop must comply with national legislation in relation to agricultural land use.	0.75	1	0.75	0	4.6.1 (core from year 0 onwards): Your company avoids negative impacts on protected areas and in areas with high conservation value, within or outside the farm or production areas. The areas used or converted to production of the Fairtrade crop comply with national legislation in relation to agricultural land use.	0.75	1	0.75	0	4.6.1: same as 2011 version	0.75
	Prohibition of production in protected areas	1	0.75	0	3.2.33 (core from year 0 onwards): Your members must avoid negative impacts on protected areas and in areas with high conservation value within or outside the farm or production areas from the date of application of certification. The areas that are used or converted to production of the Fairtrade crop must comply with national legislation in relation to agricultural land use.	0.75	1	0.75	0	3.2.30 (core from year 0 onwards): Your members avoid negative impacts on protected areas and in areas with high conservation value within or outside the farm or production areas. The areas that are used or converted to production of the Fairtrade crop comply with national legislation in relation to agricultural land use.	0.75	1	0.75	0	B3.1.13 (core from year 0 onwards): You must avoid negative impacts on protected areas and in areas with high conservation value within or outside the farm or production areas or from the date of application for certification. The areas that are used or converted to production of the Fairtrade crop must comply with national legislation in relation to agricultural land use.	0.75	1	0.75	0	4.6.1 (core from year 0 onwards): Your company avoids negative impacts on protected areas and in areas with high conservation value, within or outside the farm or production areas. The areas used or converted to production of the Fairtrade crop comply with national legislation in relation to agricultural land use.	0.75	1	0.75	0	4.6.1: same as 2011 version	0.75
	Criteria including a cut-off date to prohibit deforestation	0	0	0		0	0	0	0		0	0	0	0		0	0	0	0		0	0	0	0		0
	Clear definition of forest types that may not be converted	1	0	1	Protected area: a clearly defined geographical space, recognized, dedicated and managed, through legal or other effective means, to achieve the long-term conservation of nature with associated ecosystem services and cultural values (IUCN 2008). Protected areas can be public or private biological conservation areas. Areas with high conservation value: a concept developed by Forest Stewardship Coun…	1	1	0	1	Protected area: cf. version 1.0 for SPO Areas with high conservation value: cf. version 1.0 for SPO Deforestation: the conversion of forest to other land use or the permanent reduction of the tree canopy cover below the minimum 10 percent threshold (The Global Forest Resources Assessment, FAO, 2015). The following activities are not considered ‘deforestation': • When a tree crop is replaced by an…	1	1	0	1	Forest: cf. version 1.0 for SPO Protected area: cf. version 1.0 for SPO Areas with high conservation value: cf. version 1.0 for SPO	1	1	0	1	Forest: cf. version 1.0 for SPO Protected area: cf. version 1.0 for SPO Areas with high conservation value: cf. version 1.0 for SPO	1	1	0	1	Forest: cf. version 1.0 for SPO Protected area: cf. version 1.0 for SPO Areas with high conservation value: cf. version 1.0 for SPO	1
	Criteria to ensure adherence to national conventions and legislation on deforestation	1	0.75	0.25	3.2.33 (core from year 0 onwards): Your members must avoid negative impacts on protected areas and in areas with high conservation value within or outside the farm or production areas from the date of application of certification. The areas that are used or converted to production of the Fairtrade crop must comply with national legislation in relation to agricultural land use.	1	1	0.75	0.25	3.2.30 (core from year 0 onwards): Your members avoid negative impacts on protected areas and in areas with high conservation value within or outside the farm or production areas. The areas that are used or converted to production of the Fairtrade crop comply with national legislation in relation to agricultural land use.	1	1	0.75	0.25	B3.1.13 (core from year 0 onwards): You must avoid negative impacts on protected areas and in areas with high conservation value within or outside the farm or production areas or from the date of application for certification. The areas that are used or converted to production of the Fairtrade crop must comply with national legislation in relation to agricultural land use.	1	1	0.75	0.25	4.6.1 (core from year 0 onwards): Your company avoids negative impacts on protected areas and in areas with high conservation value, within or outside the farm or production areas. The areas used or converted to production of the Fairtrade crop comply with national legislation in relation to agricultural land use.	1	1	0.75	0.25	4.6.1: same as 2011 version	1
Conservation and restoration of natural ecosystems	Environmental impact assessment for production activities	0	0	0		0	0	0	0		0	0	0	0		0	0	0	0		0	0	0	0		0
	Criteria to enhance conservation of natural ecosystems	1	0.25	0	3.2.34 (development from year 6 onwards): You must report on activities that you or your members carry out to protect and enhance biodiversity. Guidance: Members are free to choose how they report their activities to you.	0.25	1	0.25	0	3.2.33 (new as of 2019, development from year 6 onwards): You and your members take measures to protect and enhance biodiversity. Guidance: Your members are free to choose the measures to protect and enhance biodiversity	0.25	1	0.25	0	A3.2.22 (development from year 6 onwards): You must report on activities that you or your members carry out to protect and enhance biodiversity. Guidance: Members are free to choose how they report their activities to you. B3.1.14 (development from year 6 onwards): You must maintain buffer zones around water bodies and watershed recharge areas and between production areas and areas of high conser…	0.25	1	0.25	0	4.6.2 (core from year 0 onwards): Your company maintains buffer zones around bodies of water and watershed recharge areas and between production and areas of high conservation value, either protected or not. Pesticides, hazardous chemicals and fertilizers are not applied in buffer zones. Restoration of ecological corridors may take place by actively reintroducing the native vegetation or by prote…	0.25	1	0.25	0	4.6.2: same as 2011 version 4.6.5: same as 2011 version	0.25
	Criteria on restoration of negative impact from production activities on the natural ecosystem	1	0.25	0	3.2.34 (development from year 6 onwards): You must report on activities that you or your members carry out to protect and enhance biodiversity. Guidance: Members are free to choose how they report their activities to you. 3.2.35 (development criterion from year 6 onwards): You and your members must maintain buffer zones around bodies of water and watershed recharge areas and between production ar…	0.25	1	0.25	0	3.2.33 (new as of 2019, development from year 6 onwards): You and your members take measures to protect and enhance biodiversity. Guidance: Your members are free to choose the measures to protect and enhance biodiversity 3.2.34 (development from year 6 onwards): You and your members maintain buffer zones around bodies of water and watershed recharge areas and between production areas and areas of…	0.25	1	0.25	0	A3.2.22 (development from year 6 onwards): You must report on activities that you or your members carry out to protect and enhance biodiversity. Guidance: Members are free to choose how they report their activities to you. B3.1.14 (development from year 6 onwards): You must maintain buffer zones around water bodies and watershed recharge areas and between production areas and areas of high conser…	0.25	1	0.25	0	4.6.2 (core from year 0 onwards): Your company maintains buffer zones around bodies of water and watershed recharge areas and between production and areas of high conservation value, either protected or not. Pesticides, hazardous chemicals and fertilizers are not applied in buffer zones. Restoration of ecological corridors may take place by actively reintroducing the native vegetation or by prote…	0.25	1	0.25	0	4.6.2: same as 2011 version 4.6.5: same as 2011 version	0.25
Location and land rights	Delineation of farm boundaries	0	0	0		0	0.5	0.75	0	3.2.32 (new as of 2019, core from year 1 onwards): You have a procedure in place to ensure that your members do not cause deforestation or degradation of vegetation. The procedure demonstrates a commitment to prevent deforestation. This procedure may include: • Mapping of protected areas in the region and cross-checking this information with member’s farm location to identify areas at risk. Geo-m…	0.375	0	0	0		0	0	0	0		0	0	0	0		0
	Land title and legal use rights	0	0	0		0	1	0.75	0	1.1.7 (new as of 2019, core from year 0 onwards): If there are indications of conflicts of your members' legal and legitimate right to land, water use and land tenure, they are resolved responsibly and transparently before certification can be granted. In cases where land claims and disputes are on-going, there is evidence that a legal resolution process is active and is carried out by legal auth…	0.75	0	0	0		0	0	0	0		0	1	0.75	0.25	1.2.4 (new as of 2014, core from year 0 onwards): Your company has legal and legitimate right to land use and land tenure, and respects the land rights of local and indigenous peoples. Disputes on land are resolved responsibly and transparently before certification can be granted. In cases where land claims and disputes are on-going, there is evidence that a legal resolution process is active.	1
	Criteria on the protection of local and indigenous rights	0	0	0		0	0	0	0		0	0	0	0		0	0	0	0		0	1	0.75	0.25	1.2.4 (new as of 2014, core from year 0 onwards): Your company has legal and legitimate right to land use and land tenure, and respects the land rights of local and indigenous peoples. Disputes on land are resolved responsibly and transparently before certification can be granted. In cases where land claims and disputes are on-going, there is evidence that a legal resolution process is active.	1
Sustainable land use practices	Criteria to promote agroforestry	0	0	0		0	0	0	0		0	0	0	0		0	0.5	0.5	0.25	4.6.6 (development from year 3 onwards): Your company evaluates the implementation of agro-forestry systems as well as agricultural diversification, as applicable.	0.375	0.5	0.5	0.25	4.6.6: same as 2011 version	0.375
					Average:	0.285714				Average:	0.473214				Average:	0.285714				Average:	0.3125				Average:	0.455357
VSS		UTZ
Standard version		2009/2010 (Rooibos 2011)					2014/2015					2020 (i.e. the RA standard)
Topic	Attribute name	DS score	Criticality	Explicitness	Excerpt	Final score	DS score	Criticality	Explicitness	Excerpt	Final score	DS score	Criticality	Explicitness	Excerpt	Final score
Deforestation Prevention	Prohibition of secondary or natural forest conversion	0	0.75	0.25	Coffee: 11.C.1 (mandatory from year 1 onwards): Degradation and/or deforestation of primary forest is prohibited. The producer demonstrates that there has been no degradation and/or deforestation of primary forest in the 24 months prior to the date of first registration with UTZ CERTIFIED. 11.C.3. (mandatory from year 1 onwards): Deforestation of secondary forest is only allowed if complied with …	0	0.5	0.75	0.25	I.D.112 & G.D.111 (mandatory from year 1 onwards): No deforestation or degradation of primary forest has occurred since 2008. I.D.113 & G.D.112 (mandatory from year 1 onwards): No deforestation or degradation of natural forest occurs, unless: • A legal land title and/or landowner permission and/or customary land rights are available, and • Government permits are available (if required), and • For…	0.5	0.5	0.75	0.25	6.1.1 (core requirement for group certification of small and large farms, and for individual certification): From January 1st 2014 onward, natural forests and other natural ecosystems have not been converted into agricultural production or other land uses. However, for the management of infrastructure and for minor cases of deforestation or conversion that can be remediated, some flexibility is p…	0.5
	Prohibition of primary forest conversion	1	0.75	0.25	Coffee: 11.C.1 (mandatory from year 1 onwards): Degradation and/or deforestation of primary forest is prohibited. The producer demonstrates that there has been no degradation and/or deforestation of primary forest in the 24 months prior to the date of first registration with UTZ CERTIFIED. 11.C.3. (mandatory from year 1 onwards): Deforestation of secondary forest is only allowed if complied with …	1	1	0.75	0.25	I.D.112 & G.D.111 (mandatory from year 1 onwards): No deforestation or degradation of primary forest has occurred since 2008. I.D.113 & G.D.112 (mandatory from year 1 onwards): No deforestation or degradation of natural forest occurs, unless: • A legal land title and/or landowner permission and/or customary land rights are available, and • Government permits are available (if required), and • For…	1	0.5	0.75	0.25	6.1.1 (core requirement for group certification of small and large farms, and for individual certification): From January 1st 2014 onward, natural forests and other natural ecosystems have not been converted into agricultural production or other land uses. However, for the management of infrastructure and for minor cases of deforestation or conversion that can be remediated, some flexibility is p…	0.5
	Prohibition of production in HCV or HCS areas	0	0	0		0	0	0	0		0	0.5	0.75	0	6.1.3 & 4 (core requirement for group certification of small and large farms, and for individual certification): Management includes the mitigation measures from the Farm Risk Assessment Tool in 1.3.1 with regard to High Conservation Values in the Management Plan (1.3.2). Management implements these measures (see Annex 3).	0.375
	Prohibition of production in protected areas	1	0.75	0.25	Coffee: 11.C.7 (mandatory from year 1 onwards): Coffee production does not take place in protected areas. Coffee production does not take place in the immediate vicinity (2km) of these areas if this is not allowed in the official management plan for the area. 11.C.8 (mandatory from year 1 onwards): If coffee production is in the immediate vicinity (2km) of a protected area or biological corridor,…	1	1	0.75	0.25	I.D.114 & G.D.113 (mandatory from year 1 onwards): No production or processing occurs in or within 2 km of a protected area unless it is allowed under a management plan of the area. The management plan is implemented. Management plans must be approved by a relevant national or regional authority and include at least the following: • Identification of the boundaries of areas accessible for product…	1	0.5	0.75	0.25	6.1.2 (core requirement for group certification of small and large farms, and for individual certification): Production or processing does not occur in protected areas or their officially designated buffer zones, except where it complies with applicable law.	0.5
	Criteria including a cut-off date to prohibit deforestation	1	0.75	0.25	Coffee: 11.C.1 (mandatory from year 1 onwards): Degradation and/or deforestation of primary forest is prohibited. The producer demonstrates that there has been no degradation and/or deforestation of primary forest in the 24 months prior to the date of first registration with UTZ CERTIFIED. Cocoa: 99 (mandatory from year 1 onwards): Degradation and deforestation of primary forest is prohibited. Th…	1	1	0.75	0.25	I.D.112 & G.D.111 (mandatory from year 1 onwards): No deforestation or degradation of primary forest has occurred since 2008. I.D.113 & G.D.112 (mandatory from year 1 onwards): No deforestation or degradation of natural forest occurs, unless: • A legal land title and/or landowner permission and/or customary land rights are available, and • Government permits are available (if required), and • For…	1	1	0.75	0.25	6.1.1 (core requirement for group certification of small and large farms, and for individual certification): From January 1st 2014 onward, natural forests and other natural ecosystems have not been converted into agricultural production or other land uses. However, for the management of infrastructure and for minor cases of deforestation or conversion that can be remediated, some flexibility is p…	1
	Clear definition of forest types that may not be converted	0.5	0	0.5	Primary forest: Forest that shows no or minimal disturbance by people and/or demonstrates the diversity, structure and ecological services of a mature forest for that region. Natural disturbances like natural fires or windstorms do not convert primary forest into secondary forest. Protected area: Area under legal protection in order to conserve biodiversity (e.g. national parks and reserves). Sec…	0.25	0.5	0	1	Forest: Land spanning more than 0.5 hectares with trees higher than 5 meters and a canopy cover of more than 10 percent, or trees able to reach these thresholds in situ. It does not include land that is predominantly under agricultural or urban land use. • Natural forest: A forest that has not been planted, and is primarily composed of indigenous trees. • Primary forest: A forest that has never b…	0.5	1	0	1	Natural ecosystem: An ecosystem that substantially resembles – in terms of species composition, structure, and ecological function – one that is or would be found in a given area in the absence of major human impacts. This includes human-managed ecosystems where much of the natural species composition, structure, and ecological function are present. Natural ecosystems include all-natural terrestr…	1
	Criteria to ensure adherence to national conventions and legislation on deforestation	0	0	0		0	1	0.75	0	UTZ Certified strives for its members to become exemplary figures for improving social, economic, and environmental conditions in their areas of operation. In this regard, groups and group members obey national laws, regulations, and sector agreements or collective bargaining agreements. There may be a discrepancy between what is required in a control point and what is required under national or …	0.75	1	0.75	0.25	1.2.1 (core requirement for group certification of small and large farms, and for individual certification): Management complies with applicable laws and collective bargaining agreements (CBA) within the scope of the Rainforest Alliance Sustainable Agriculture Standard. In the case that an applicable law or CBA is stricter than a criterion in the standard, such law or CBA will prevail unless such…	1
Conservation and restoration of natural ecosystems	Environmental impact assessment for production activities	1	0.5	0.25	Coffee: 11.A.1 (mandatory from year 2 onwards): The certificate holder conducts a risk assessment on environmental impacts. The assessment is regularly reviewed and kept up to date. The assessment can be done regionally and can be conducted by an external party. 11.A.2 (mandatory from year 4 onwards): Based on the risk assessment on environmental impacts (11.A.1), the certificate holder makes and…	0.75	1	0.5	0.25	I.A.11 & G.A.18 (for individuals mandatory from year 2 onwards and for groups from year 4 onwards): A risk assessment is carried out to identify possible risks in production and processing related to: block A) Management, block B) Farming Practices, block C) Working Conditions and block D) Environment. The risk assessment is annually reviewed and kept up-to-date. The risk assessment considers the…	0.75	1	0.75	0.25	6.2.1 (core requirement for group certification of large farms by group management, and for individual certification): Management develops and implements a plan to conserve natural ecosystems. The plan is based on the map required in 1.2.9 and the natural ecosystems section of the Risk Assessment Tool in 1.3.1 and is updated annually (see Annex 3 and Guidance Document on natural ecosystems and ve…	1
	Criteria to enhance conservation of natural ecosystems	1	0.5	0.25	Coffee: 11.A.3 (mandatory from year 4 onwards): The certificate holder has a conservation plan or participates in a regional biodiversity or forest management plan. Cocoa: 106 (from year 3 onwards): The certificate holder has a conservation plan or participates in a regional management plan. Tea: 10.A.3 (mandatory from year 3 onwards): The certificate holder has a conservation plan or participate…	0.75	1	0.5	0.25	I.D.116 & G.D.115 (for individual certification mandatory from year 4 onwards and non-mandatory for group certification): The producer promotes ecological diversity by protecting and enhancing habitats and ecosystems. Examples include: • Planting trees and/or flowers • Safeguarding biological corridors • Preservation of semi-natural areas (e.g. hedges, meadows. etc.) Shaded cropping/agroforestry …	0.75	1	0.75	0.25	6.2.1 (core requirement for group certification of large farms by group management, and for individual certification): Management develops and implements a plan to conserve natural ecosystems. The plan is based on the map required in 1.2.9 and the natural ecosystems section of the Risk Assessment Tool in 1.3.1 and is updated annually (see Annex 3 and Guidance Document on natural ecosystems and ve…	1
	Criteria on restoration of negative impact from production activities on the natural ecosystem	1	0.25	0.25	Coffee: 11.C.6 (additional requirement): The producer re-forests and stimulates ecological restoration of areas that are not used for agricultural production on the farm as much as possible. Cocoa: / Tea: 10.C.5 (additional requirement): The producer re-forests and stimulates ecological restoration of areas that are not used for agricultural production on the farm as much as possible. Rooibos: 11…	0.5	0	0	0		0	1	0.5	0.25	6.2.3 (mandatory smart meter requirement for all): Producers maintain and management monitors natural vegetation cover and reports annually on the indicator (% of total farm area under natural vegetation cover) from year one onwards. If there is less than 10% of the total area under natural vegetation cover or less than 15% for farms growing shade-tolerant crops, management sets targets and takes…	0.75
Location and land rights	Delineation of farm boundaries	1	0.75	0.25	Coffee: 2.A.1 (mandatory from year 1 onwards): The certificate holder has an overview map of the production area. This map has to include the coffee areas with aggregated planted areas and nurseries, protected areas, water streams and sources and human settlements. Estates identify the coffee fields with a unique name, number, code or specific color on all the records. Cocoa: 159 (mandatory from …	1	1	0.75	0.25	I.A.1 & G.A.1 (for individuals mandatory from year 1 onwards and for groups from year 2 onwards): An up-to date overview map of the production area(s) is available. This map includes: • Crop areas with newly planted areas and nurseries, • Protected areas, • Water bodies, • Human settlements, and • A GPS coordinate of the IMS administration location (if this does not represent a location within th…	1	0.5	0.75	0.25	1.2.10 (core requirement for group certification of large farms or group management, and for individual certification): An up to date map of the farm (large farms) or the farm area (group of small farms) is available, including: 1.2.11 (core requirement for group certification of small farms): A sketch of the farm is available. 1.2.12 (core requirement for group certification by group management)…	0.5
	Land title and legal use rights	0	0	0		0	1	0.25	0.25	I.D.113 & G.D.112 (mandatory from year 1 onwards): No deforestation or degradation of natural forest occurs, unless: • A legal land title and/or landowner permission and/or customary land rights are available, and • Government permits are available (if required), and • For individual certification only: there is a report produced by an environmental expert confirming that the appropriate clearing…	0.5	1	0.75	0.25	5.8.2 (core requirement for group certification of small and large farms, and for individual certification): The producer has legal and legitimate right to use the land. Upon request, this right is substantiated by ownership, leasehold, or other legal documents or by documentation of traditional or customary use rights. In the event that indigenous peoples and local communities, current or former…	1
	Criteria on the protection of local and indigenous rights	0	0	0		0	0	0	0		0	1	0.75	0.25	5.8.1 (core requirement of group certification of large farms, and individual certification): Management respects legal and customary rights of indigenous peoples and local communities. Activities diminishing the land or resource use rights or collective interests of indigenous peoples and local communities, including High Conservation Values (HCVs) 5 or 6, are conducted only after having receive…	1
Sustainable land use practices	Criteria to promote agroforestry	1	0.5	0.25	Coffee: 11.C.5 (mandatory from year 1 onwards): The producer uses shade trees whenever this is compatible with the local coffee production practices and takes into consideration the productivity. Cocoa: 93 (mandatory from year 2 onwards): The producers maintain (or plant enough to eventually have) at least 18 mature shade trees per hectare dispersed on their farms. If there are currently too few …	0.75	0	0	0	I.D.116 & G.D.115 (for individual certification mandatory from year 4 onwards and non-mandatory for group certification): The producer promotes ecological diversity by protecting and enhancing habitats and ecosystems. Examples include: • Planting trees and/or flowers • Safeguarding biological corridors • Preservation of semi-natural areas (e.g. hedges, meadows. etc.) Shaded cropping/agroforestry …	0	1	0.75	0.25	6.2.5 (self-selected smart meter requirement for group certification of small and large farms, and for individual certification): Farms with shade-tolerant crops work towards agroforestry systems with optimal shade coverage and species diversity according to the shade coverage and species diversity reference parameters (i.e., minimum canopy cover of 20-40% and minimum number of native tree specie…	1
					Average:	0.5				Average:	0.553571				Average:	0.794643
VSS		4C
Standard version		2010					2015					2020
Topic	Attribute name	DS score	Criticality	Explicitness	Excerpt	Final score	DS score	Criticality	Explicitness	Excerpt	Final score	DS score	Criticality	Explicitness	Excerpt	Final score
Deforestation Prevention	Prohibition of secondary or natural forest conversion	0	0	0		0	0	0	0		0	0	0	0		0
	Prohibition of primary forest conversion	0	0	0		0	1	0.75	0.25	UP7: similar to UP8 of version 2010 but more elaborated: Cutting of primary forest or destruction of other forms of natural resources that are either designated by national and/ or international legislation. Description of status: Primary forest cutting and the destruction of other natural resources within protected areas is practiced. Scope: primary forest, protected areas and areas of high cons…	1	1	0.75	0.25	3.1.1 Primary forests and protected areas are protected. Check-point for Managing Entities: • Level 1: A map of the 4C Unit’s land use, protected areas, watersheds, and water sources is available. • Level 2: If BP Producers of a 4C Unit are located in or close to a protected area, the ME must be informed about the management plan of the protected area and must know the regulations regarding land …	1
	Prohibition of production in HCV or HCS areas	0	0	0		0	1	0.75	0	UP7: similar to UP8 of version 2010 but more elaborated: Cutting of primary forest or destruction of other forms of natural resources that are either designated by national and/ or international legislation. Description of status: Primary forest cutting and the destruction of other natural resources within protected areas is practiced. Scope: primary forest, protected areas and areas of high cons…	0.75	1	0.5	0.25	3.1.2 Areas of high biodiversity, natural vegetation, fauna, soil and water sources and sensitive areas are conserved and/or restored. Check-point for Managing Entities: • Level 2: The Managing Entity has developed an action plan on a landscape level (area where its business partners are located) to protect and restore areas of high biodiversity, natural vegetation, fauna, soil and water sources,…	0.75
	Prohibition of production in protected areas	1	0.75	0.25	UP8: No cutting of primary forest or destruction of other forms of natural resources that are designated as protected areas by national and/or international legislation.	1	1	0.75	0.25	UP7: similar to UP8 of version 2010 but more elaborated: Cutting of primary forest or destruction of other forms of natural resources that are either designated by national and/ or international legislation. Description of status: Primary forest cutting and the destruction of other natural resources within protected areas is practiced. Scope: primary forest, protected areas and areas of high cons…	1	1	0.75	0.25	3.1.1 Primary forests and protected areas are protected. Check-point for Managing Entities: • Level 1: A map of the 4C Unit’s land use, protected areas, watersheds, and water sources is available. • Level 2: If BP Producers of a 4C Unit are located in or close to a protected area, the ME must be informed about the management plan of the protected area and must know the regulations regarding land …	1
	Criteria including a cut-off date to prohibit deforestation	0	0	0		0	1	0.75	0.25	UP7: similar to UP8 of version 2010 but more elaborated: Cutting of primary forest or destruction of other forms of natural resources that are either designated by national and/ or international legislation. Description of status: Primary forest cutting and the destruction of other natural resources within protected areas is practiced. Scope: primary forest, protected areas and areas of high cons…	1	1	0.75	0.25	3.1.1 Primary forests and protected areas are protected. Check-point for Managing Entities: • Level 1: A map of the 4C Unit’s land use, protected areas, watersheds, and water sources is available. • Level 2: If BP Producers of a 4C Unit are located in or close to a protected area, the ME must be informed about the management plan of the protected area and must know the regulations regarding land …	1
	Clear definition of forest types that may not be converted	0	0	0	Not found	0	1	0	1	Biodiversity: “Biological diversity” means the variability of living organisms from all sources include: inter alia, terrestrial, marine and other aquatic ecosystems and the ecological complexes of which they are a part; this includes diversity within species, between species and of entire ecosystems (Convention on Biological Diversity 1992). Native flora and fauna: those vegetation and animal sp…	1	0.5	0	1	Biodiversity: Biological diversity means the variability of living organisms for all sources including inter alia, terrestrial, marine, and other aquatic ecosystems and the ecological complexes of which they are a part; this includes diversity within species, between species and of entire ecosystems. In the context of the good agricultural practice referred to in the 4C Code of Conduct, it applie…	0.5
	Criteria to ensure adherence to national conventions and legislation on deforestation	1	0.75	0	UP10: Immoral transactions in business relations according to international covenants, national law and practices (referring to OECD Guidelines for Multinational Enterprises and the UN Convention on Contracts for the International Sale of Goods).	0.75	1	0.75	0.25	UP7: similar to UP8 of version 2010 but more elaborated: Cutting of primary forest or destruction of other forms of natural resources that are either designated by national and/ or international legislation. Description of status: Primary forest cutting and the destruction of other natural resources within protected areas is practiced. Scope: primary forest, protected areas and areas of high cons…	1	1	0.75	0.25	1.1.3: All applicable regional and national laws are complied with • Level 1: There is no indication of any violation against regional and national laws and regulations connected to 4C requirements	1
Conservation and restoration of natural ecosystems	Environmental impact assessment for production activities	0	0	0		0	0	0	0		0	1	0.25	0.25	2.1.14: Impact of operations for surrounding communities is assessed • Level 3+: Negative impacts from the BPs operations on neighbouring communities are assessed and identified (not applicable for smallholders) • Level 3+: BPs address identified negative impacts (not applicable for smallholders) • Continuous: BPs support economic development by providing opportunities for local employment and pr…	0.5
	Criteria to enhance conservation of natural ecosystems	1	0.5	0.25	CB1: Conservation of biodiversity, including protected or endangered native flora and fauna is supported. No exploitation of endangered and protected species and native flora is practiced. Green: A program of conserving and enhancing wildlife and native flora is developed and implemented: • Each individual farm has a map indicating land use; and • A general map of the Unit´s land use exists; and …	0.75	1	0.5	0.25	3.1: similar to CB1 of version 1.4 but more elaborated: Conservation of biodiversity, including protected or endangered native flora and fauna is supported. Green: A program of conservation and enhancing wildlife and native flora is developed and implemented: • Each individual farm has a map indicating land use; and • A general map of the Unit´s land use exists; and • There are measures and actio…	0.75	1	0.5	0.25	3.1.2 Areas of high biodiversity, natural vegetation, fauna, soil and water sources and sensitive areas are conserved and/or restored. Check-point for Managing Entities: • Level 2: The Managing Entity has developed an action plan on a landscape level (area where its business partners are located) to protect and restore areas of high biodiversity, natural vegetation, fauna, soil and water sources,…	0.75
	Criteria on restoration of negative impact from production activities on the natural ecosystem	0	0	0		0	1	0.5	0.25	3.1: similar to CB1 of version 1.4 but more elaborated: Conservation of biodiversity, including protected or endangered native flora and fauna is supported. Green: A program of conservation and enhancing wildlife and native flora is developed and implemented: • Each individual farm has a map indicating land use; and • A general map of the Unit´s land use exists; and • There are measures and actio…	0.75	1	0.5	0.25	3.1.2 Areas of high biodiversity, natural vegetation, fauna, soil and water sources and sensitive areas are conserved and/or restored. Check-point for Managing Entities: • Level 2: The Managing Entity has developed an action plan on a landscape level (area where its business partners are located) to protect and restore areas of high biodiversity, natural vegetation, fauna, soil and water sources,…	0.75
Location and land rights	Delineation of farm boundaries	1	0.5	0.25	CB1: Conservation of biodiversity, including protected or endangered native flora and fauna is supported. No exploitation of endangered and protected species and native flora is practiced. Green: A program of conserving and enhancing wildlife and native flora is developed and implemented: • Each individual farm has a map indicating land use; and • A general map of the Unit´s land use exists; and …	0.75	1	0.5	0.25	3.1: similar to CB1 of version 1.4 but more elaborated: Conservation of biodiversity, including protected or endangered native flora and fauna is supported. Green: A program of conservation and enhancing wildlife and native flora is developed and implemented: • Each individual farm has a map indicating land use; and • A general map of the Unit´s land use exists; and • There are measures and actio…	0.75	1	0.75	0.25	1.1.1 An Internal Management System is implemented. Check-point for Managing Entities: • Level 1: Geo-coordinates are available for 100% of the business partner producers. 3.1.1 Primary forests and protected areas are protected. Check-point for Managing Entities: • Level 1: A map of the 4C Unit’s land use, protected areas, watersheds, and water sources is available. • Level 2: If BP Producers of …	1
	Land title and legal use rights	0	0	0		0	1	0.75	0.25	UP7: similar to UP8 of version 2010 but more elaborated: Cutting of primary forest or destruction of other forms of natural resources that are either designated by national and/ or international legislation. Description of status: Primary forest cutting and the destruction of other natural resources within protected areas is practiced. Scope: primary forest, protected areas and areas of high cons…	1	1	0.75	0.25	Criteria: 2.1.1: Practices of forced eviction do not exist • Level 1: There is no indication of forced evictions against persons, families and/or groups from their homes and communities without mutually agreed compensation since 2006 • Level 1: New land acquisitions have been carried out with free, prior, and informed consent (FPIC) of affected people • Level 1: BP Producers do have a legal land …	1
	Criteria on the protection of local and indigenous rights	0	0	0		0	0	0	0		0	0	0	0		0
Sustainable land use practices	Criteria to promote agroforestry	0	0	0		0	0	0	0		0	0	0	0		0
					Average:	0.232143				Average:	0.642857				Average:	0.660714
VSS		Organic
Standard version		2012					2014
Topic	Attribute name	DS score	Criticality	Explicitness	Excerpt	Final score	DS score	Criticality	Explicitness	Excerpt	Final score
Deforestation Prevention	Prohibition of secondary or natural forest conversion	0	0	0		0	0	0	0		0
	Prohibition of primary forest conversion	0	0	0		0	0	0	0		0
	Prohibition of production in HCV or HCS areas	1	0.5	0.25	2.1 Ecosystem Management: General principle: Organic farming benefits the quality of ecosystems. Requirements: 2.1.2 Clearing or destruction of High Conservation Value Areas is prohibited. Farming areas installed on land that has been obtained by clearing of High Conservation Value Areas in the preceding 5 years shall not be considered compliant with this standard.	0.75	1	0.5	0.25	2.1 Ecosystem Management: General principle: Organic farming benefits the quality of ecosystems. Requirements: 2.1.2 Clearing or destruction of High Conservation Value Areas is prohibited. Farming areas installed on land that has been obtained by clearing of High Conservation Value Areas in the preceding 5 years shall not be considered compliant with this standard.	0.75
	Prohibition of production in protected areas	0	0	0		0	0	0	0		0
	Criteria including a cut-off date to prohibit deforestation	1	0.5	0.25	2.1 Ecosystem Management: General principle: Organic farming benefits the quality of ecosystems. Requirements: 2.1.2 Clearing or destruction of High Conservation Value Areas is prohibited. Farming areas installed on land that has been obtained by clearing of High Conservation Value Areas in the preceding 5 years shall not be considered compliant with this standard.	0.75	1	0.5	0.25	2.1 Ecosystem Management: General principle: Organic farming benefits the quality of ecosystems. Requirements: 2.1.2 Clearing or destruction of High Conservation Value Areas is prohibited. Farming areas installed on land that has been obtained by clearing of High Conservation Value Areas in the preceding 5 years shall not be considered compliant with this standard.	0.75
	Clear definition of forest types that may not be converted	0.5	0	1	Habitat: The area over which a plant or animal species naturally exists; the area where a species occurs. Also used to indicate types of habitat, e.g. seashore, riverbank, woodland, grassland. High Conservation Value Area: An area that has been identified as having outstanding and critical importance due to its environmental, socioeconomic, biodiversity or landscape values. Sustainable: Use of a …	0.5	0.5	0	1	Habitat: The area over which a plant or animal species naturally exists; the area where a species occurs. Also used to indicate types of habitat, e.g. seashore, riverbank, woodland, grassland. High Conservation Value Area: An area that has been identified as having outstanding and critical importance due to its environmental, socioeconomic, biodiversity or landscape values. Sustainable: Use of a …	0.5
	Criteria to ensure adherence to national conventions and legislation on deforestation	0	0	0		0	0	0	0		0
Conservation and restoration of natural ecosystems	Environmental impact assessment for production activities	0	0	0		0	0	0	0		0
	Criteria to enhance conservation of natural ecosystems	1	0.5	0.25	2.1 Ecosystem Management: General principle: Organic farming benefits the quality of ecosystems. Requirements: 2.1.1 Operators shall design and implement measures to maintain and improve landscape and enhance biodiversity quality, by maintaining on-farm wildlife refuge habitats or establishing them where none exist. Such habitats may include, but are not limited to: a. extensive grassland such as…	0.75	1	0.5	0.25	2.1 Ecosystem Management: General principle: Organic farming benefits the quality of ecosystems. Requirements: 2.1.1 Operators shall design and implement measures to maintain and improve landscape and enhance biodiversity quality, by maintaining on-farm wildlife refuge habitats or establishing them where none exist. Such habitats may include, but are not limited to: a. extensive grassland such as…	0.75
	Criteria on restoration of negative impact from production activities on the natural ecosystem	1	0.5	0	2.1 Ecosystem Management: General principle: Organic farming benefits the quality of ecosystems. Requirements: 2.1.1 Operators shall design and implement measures to maintain and improve landscape and enhance biodiversity quality, by maintaining on-farm wildlife refuge habitats or establishing them where none exist. Such habitats may include, but are not limited to: a. extensive grassland such as…	0.5	1	0.5	0	2.1 Ecosystem Management: General principle: Organic farming benefits the quality of ecosystems. Requirements: 2.1.1 Operators shall design and implement measures to maintain and improve landscape and enhance biodiversity quality, by maintaining on-farm wildlife refuge habitats or establishing them where none exist. Such habitats may include, but are not limited to: a. extensive grassland such as…	0.5
Location and land rights	Delineation of farm boundaries	0.5	0.5	0	8.1: Certification of wild products Requirements: 8.1.1: If the certification body includes wild product within its certification scope, it shall have documented requirements and an inspection regime that at least requires that: a. the operator issues instructions to the collectors and any local agents (middlemen), that at least defines the area of collection and informs them about the standards …	0.25	0.5	0.5	0	8.1: Certification of wild products Requirements: 8.1.1: If the certification body includes wild product within its certification scope, it shall have documented requirements and an inspection regime that at least requires that: a. the operator issues instructions to the collectors and any local agents (middlemen), that at least defines the area of collection and informs them about the standards …	0.25
	Land title and legal use rights	1	0.25	0	9. Social justice General principle: Social justice and social rights are an integral part of organic agriculture and processing Recommendation: Operators should positively and actively encourage the collective organization of their employees or contracted smallholders. Permanent employees and their families should have access to education, transportation and health services. Operators should res…	0.25	1	0.25	0	9. Social justice General principle: Social justice and social rights are an integral part of organic agriculture and processing Recommendation: Operators should positively and actively encourage the collective organization of their employees or contracted smallholders. Permanent employees and their families should have access to education, transportation and health services. Operators should res…	0.25
	Criteria on the protection of local and indigenous rights	1	0.5	0.25	9. Social justice General principle: Social justice and social rights are an integral part of organic agriculture and processing Recommendation: Operators should positively and actively encourage the collective organization of their employees or contracted smallholders. Permanent employees and their families should have access to education, transportation and health services. Operators should res…	0.75	1	0.5	0.25	9. Social justice General principle: Social justice and social rights are an integral part of organic agriculture and processing Recommendation: Operators should positively and actively encourage the collective organization of their employees or contracted smallholders. Permanent employees and their families should have access to education, transportation and health services. Operators should res…	0.75
Sustainable land use practices	Criteria to promote agroforestry	0	0	0		0	0	0	0		0
					Average:	0.321429				Average:	0.321429
VSS		GlobalGAP
Standard version		2007					2011					2013
Topic	Attribute name	DS score	Criticality	Explicitness	Excerpt	Final score	DS score	Criticality	Explicitness	Excerpt	Final score	DS score	Criticality	Explicitness	Excerpt	Final score
Deforestation Prevention	Prohibition of secondary or natural forest conversion	1	0.75	0.25	CO.2.1.1 and TE.2.1.1 (major must): There is evidence that the farmed area has not derived from primary forest deforested after September 2004 for coffee and March 2006 for tea nor from secondary forest without compensation. No N/A CO.2.1.3 and TE.2.1.3 (recommendation): New coffee/tea plantings are compatible with good resource conservation practice proven in comparable locations. CO.10.1.1 and …	1	1	0.75	0.25	CO.2.1.1 and TE.2.1.1: same as CO.2.1.1 and TE.2.1.1 version 3.0 CO.2.1.3 and TE.2.1.3: same as CO.2.1.3 and TE.2.1.3 version 3.0 CO.10.1.1 and TE.11.1.1: same as CO.10.1.1 and TE.11.1.1 version 3.0 CO.10.1.8 and TE.11.1.7: same as CO.10.1.8 and TE.11.1.7 version 3.0 CO.10.2.5 and TE.11.2.4: same as CO.10.2.5 and TE.11.2.4 version 3.0	1	1	0.75	0.25	TE.2.1.1: same as TE.2.1.1 version 3.0 TE.2.1.3: same as TE.2.1.3 version 3.0 TE.9.1.1: same as TE.11.1.1 version 3.0 TE.9.1.7: same as TE.11.1.7 version 3.0 TE.9.2.2: same as TE.11.2.4 version 3.0	1
	Prohibition of primary forest conversion	1	0.75	0.25	CO.2.1.1 and TE.2.1.1 (major must): There is evidence that the farmed area has not derived from primary forest deforested after September 2004 for coffee and March 2006 for tea nor from secondary forest without compensation. No N/A CO.2.1.3 and TE.2.1.3 (recommendation): New coffee/tea plantings are compatible with good resource conservation practice proven in comparable locations. CO.10.1.1 and …	1	1	0.75	0.25	CO.2.1.1 and TE.2.1.1: same as CO.2.1.1 and TE.2.1.1 version 3.0 CO.2.1.3 and TE.2.1.3: same as CO.2.1.3 and TE.2.1.3 version 3.0 CO.10.1.1 and TE.11.1.1: same as CO.10.1.1 and TE.11.1.1 version 3.0 CO.10.1.8 and TE.11.1.7: same as CO.10.1.8 and TE.11.1.7 version 3.0 CO.10.2.5 and TE.11.2.4: same as CO.10.2.5 and TE.11.2.4 version 3.0	1	1	0.75	0.25	TE.2.1.1: same as TE.2.1.1 version 3.0 TE.2.1.3: same as TE.2.1.3 version 3.0 TE.9.1.1: same as TE.11.1.1 version 3.0 TE.9.1.7: same as TE.11.1.7 version 3.0 TE.9.2.2: same as TE.11.2.4 version 3.0	1
	Prohibition of production in HCV or HCS areas	1	0.25	0.25	CO.10.1.10 and TE.11.1.9 (recommendation): Areas of ecological, social, cultural or religious significance should be clearly identified, delineated and preserved.	0.5	1	0.25	0.25	CO.10.1.10 and TE.11.1.9: same as CO.10.1.10 and TE.11.1.9 version 3.0	0.5	1	0.25	0.25	TE.9.1.9: same as TE.11.1.9 version 3.0	0.5
	Prohibition of production in protected areas	0	0	0		0	0	0	0		0	0	0	0		0
	Criteria including a cut-off date to prohibit deforestation	1	0.75	0.25	CO.2.1.1 and TE.2.1.1 (major must): There is evidence that the farmed area has not derived from primary forest deforested after September 2004 for coffee and March 2006 for tea nor from secondary forest without compensation. No N/A CO.2.1.3 and TE.2.1.3 (recommendation): New coffee/tea plantings are compatible with good resource conservation practice proven in comparable locations. CO.10.1.1 and …	1	1	0.75	0.25	CO.2.1.1 and TE.2.1.1: same as CO.2.1.1 and TE.2.1.1 version 3.0 CO.2.1.3 and TE.2.1.3: same as CO.2.1.3 and TE.2.1.3 version 3.0 CO.10.1.1 and TE.11.1.1: same as CO.10.1.1 and TE.11.1.1 version 3.0 CO.10.1.8 and TE.11.1.7: same as CO.10.1.8 and TE.11.1.7 version 3.0 CO.10.2.5 and TE.11.2.4: same as CO.10.2.5 and TE.11.2.4 version 3.0	1	1	0.75	0.25	TE.2.1.1: same as TE.2.1.1 version 3.0 TE.2.1.3: same as TE.2.1.3 version 3.0 TE.9.1.1: same as TE.11.1.1 version 3.0 TE.9.1.7: same as TE.11.1.7 version 3.0 TE.9.2.2: same as TE.11.2.4 version 3.0	1
	Clear definition of forest types that may not be converted	0	0	1	Environment: water, air, land, wild species of fauna and flora, and any interrelationship between them, as well as any relationship with living organisms. Forest patches: Refers to the ecosystem scale at which a relatively homogenous forest unit can be identified. The composition, structure, and ecological functions within the unit are similar enough that an ecologically responsible forest use pr…	0	0	0	0	No definitions found	0	0.5	0	1	High Conservation Value (HCV): An area that has a biological, ecological, social or cultural value of outstanding significance or critical importance as follows, such as: • Areas with species diversity, concentrations of biological diversity including endemic species, and rare, threatened or endangered species, that are significant at global, regional or national levels • Areas with landscape-lev…	0.5
	Criteria to ensure adherence to national conventions and legislation on deforestation	1	0.75	0.25	The standard uses national interpretation guidelines (NIGs) to align global requirements with local regulations and practice4. These NIGs are developed by national technical working groups (NTWGs) and clarify how universal requirements should be applied in specific countries, incorporating relevant national legislation	1	1	0.75	0.25	The standard uses national interpretation guidelines (NIGs) to align global requirements with local regulations and practice4. These NIGs are developed by national technical working groups (NTWGs) and clarify how universal requirements should be applied in specific countries, incorporating relevant national legislation	1	1	0.75	0.25	The standard uses national interpretation guidelines (NIGs) to align global requirements with local regulations and practice4. These NIGs are developed by national technical working groups (NTWGs) and clarify how universal requirements should be applied in specific countries, incorporating relevant national legislation	1
Conservation and restoration of natural ecosystems	Environmental impact assessment for production activities	1	0.75	0.25	AF.2.2.1 (major must): Establishment of a risk assessment for new agricultural sites (i.e. crop, livestock or aquaculture enterprises) or existing sites only where risks have changed, which shows the site in question to be suitable for production, with regards to food safety, operator health, the environment and animal health where applicable: A documented risk assessment must be carried out when…	1	1	0.75	0.25	AF.1.2.1: similar to AF.2.2.1 version 3.0: Risk assessment is needed for initial inspection for all sites registered for certification as well.	1	1	0.75	0.25	AF.1.2.1: similar to AF.2.2.1 version 3.0: more elaborated upon the specifications.	1
	Criteria to enhance conservation of natural ecosystems	1	0.5	0.25	AF.5.1.1 (minor must): Each producer has a wildlife and conservation plan for the enterprise that acknowledges the impact of farming activities on the environment: There must be a written action plan which aims to enhance habitats and increase biodiversity on the farm. This can be either a regional activity or individual plan, if the farm is participating in or covered by it. This includes knowle…	0.75	1	0.5	0.25	AF.6.1.1: similar to AF.5.1.1 version 3.0 AF.6.1.2: similar to AF.5.1.2 and AF.5.1.3 version 3.0: addition of: … There is a commitment within the conservation plan to undertake a base line audit of the current levels, location, condition etc. of the fauna and flora on farm so as to enable actions to be planned. Within the conservation plan there is a clear list of priorities and actions to enhanc…	0.75	1	0.5	0.25	AF 7.1.1: similar to AF.5.1.1 version 3.0: addition of: It shall pay special attention to areas of environmental interest being protected and make reference to legal requirements where applicable. AF.7.1.2: similar to AF.5.1.2 and AF.5.1.3 version 3.0: addition of: … There is a commitment within the conservation plan to undertake a base line audit of the current levels, location, condition etc. o…	0.75
	Criteria on restoration of negative impact from production activities on the natural ecosystem	1	0.25	0.25	AF.5.1.1 (minor must): Each producer has a wildlife and conservation plan for the enterprise that acknowledges the impact of farming activities on the environment: There must be a written action plan which aims to enhance habitats and increase biodiversity on the farm. This can be either a regional activity or individual plan, if the farm is participating in or covered by it. This includes knowle…	0.5	1	0.25	0.25	AF.6.1.1: similar to AF.5.1.1 version 3.0 AF.6.1.2: similar to AF.5.1.2 and AF.5.1.3 version 3.0: addition of: … There is a commitment within the conservation plan to undertake a base line audit of the current levels, location, condition etc. of the fauna and flora on farm so as to enable actions to be planned. Within the conservation plan there is a clear list of priorities and actions to enhanc…	0.5	1	0.25	0.25	AF 7.1.1: similar to AF.5.1.1 version 3.0: addition of: It shall pay special attention to areas of environmental interest being protected and make reference to legal requirements where applicable. AF.7.1.2: similar to AF.5.1.2 and AF.5.1.3 version 3.0: addition of: … There is a commitment within the conservation plan to undertake a base line audit of the current levels, location, condition etc. o…	0.5
Location and land rights	Delineation of farm boundaries	1	0.5	0.25	AF.2.1.2 (minor must): Establishment of a reference system for each field, orchard, greenhouse, yard, plot, livestock building or other area/location used in production established and referenced on a farm plan or map: Compliance must include visual identification in the form of a physical sign at each field/greenhouse/plot/livestock building/pen or other farm, or a farm plan or map that could be…	0.75	1	0.5	0.25	AF.1.1.1: similar to AF.2.1.2 version 3.0	0.75	1	0.5	0.25	AF1.1.1: similar to AF.2.1.2 version 3.0	0.75
	Land title and legal use rights	0	0	0		0	0	0	0		0	0	0	0		0
	Criteria on the protection of local and indigenous rights	0	0	0		0	0	0	0		0	0	0	0		0
Sustainable land use practices	Criteria to promote agroforestry	0	0	0		0	0	0	0		0	0	0	0		0
					Average:	0.535714				Average:	0.535714				Average:	0.571429
VSS		ProTerra
Standard version		2011					2014					2018
Topic	Attribute name	DS score	Criticality	Explicitness	Excerpt	Final score	DS score	Criticality	Explicitness	Excerpt	Final score	DS score	Criticality	Explicitness	Excerpt	Final score
Deforestation Prevention	Prohibition of secondary or natural forest conversion	0	0	0		0	0	0	0		0	0	0	0		0
	Prohibition of primary forest conversion	1	0.75	0.25	10.1: Areas of native vegetation and other high conservation value areas, cleared after 2004 cannot not be converted into agricultural areas or used for industrial or other commercial purposes, in particular the following: Primary Forests (i.e. rainforests); Riparian Vegetation; Wetlands; Swamps; Floodplains; Steep slopes; Other high conservation value areas • 10.1.2 (core criterion): In all case…	1	1	0.75	0.25	4.1: similar to criterion 10.1 of version 2.9.5: Land conversion: • 4.1.1 (core criterion): For certification under this Standard, areas of native vegetation and other high conservation value areas cannot have been cleared or converted into agricultural areas, or used for industrial or other commercial purposes, after 2004, in particular the following: Primary Forests (i.e. rainforests); Riparian…	1	1	0.75	0.25	4.1: similar to criterion 4.1 of version 3.0: • 4.1.1: change of cut-off date to 2008 and inclusion of high above-ground carbon stocks and other areas as defined by the High Conservation Values Resource Network (HCV 1 to 6). • 4.1.3: removed	1
	Prohibition of production in HCV or HCS areas	1	0.75	0.25	10.1: Areas of native vegetation and other high conservation value areas, cleared after 2004 cannot not be converted into agricultural areas or used for industrial or other commercial purposes, in particular the following: Primary Forests (i.e. rainforests); Riparian Vegetation; Wetlands; Swamps; Floodplains; Steep slopes; Other high conservation value areas • 10.1.2 (core criterion): In all case…	1	1	0.75	0.25	4.1: similar to criterion 10.1 of version 2.9.5: Land conversion: • 4.1.1 (core criterion): For certification under this Standard, areas of native vegetation and other high conservation value areas cannot have been cleared or converted into agricultural areas, or used for industrial or other commercial purposes, after 2004, in particular the following: Primary Forests (i.e. rainforests); Riparian…	1	1	0.75	0.25	4.1: similar to criterion 4.1 of version 3.0: • 4.1.1: change of cut-off date to 2008 and inclusion of high above-ground carbon stocks and other areas as defined by the High Conservation Values Resource Network (HCV 1 to 6). • 4.1.3: removed	1
	Prohibition of production in protected areas	0	0	0		0	0	0	0		0	0	0	0		0
	Criteria including a cut-off date to prohibit deforestation	1	0.75	0.25	10.1: Areas of native vegetation and other high conservation value areas, cleared after 2004 cannot not be converted into agricultural areas or used for industrial or other commercial purposes, in particular the following: Primary Forests (i.e. rainforests); Riparian Vegetation; Wetlands; Swamps; Floodplains; Steep slopes; Other high conservation value areas • 10.1.2 (core criterion): In all case…	1	1	0.75	0.25	4.1: similar to criterion 10.1 of version 2.9.5: Land conversion: • 4.1.1 (core criterion): For certification under this Standard, areas of native vegetation and other high conservation value areas cannot have been cleared or converted into agricultural areas, or used for industrial or other commercial purposes, after 2004, in particular the following: Primary Forests (i.e. rainforests); Riparian…	1	1	0.75	0.25	4.1: similar to criterion 4.1 of version 3.0: • 4.1.1: change of cut-off date to 2008 and inclusion of high above-ground carbon stocks and other areas as defined by the High Conservation Values Resource Network (HCV 1 to 6). • 4.1.3: removed	1
	Clear definition of forest types that may not be converted	0	0	0		0	0	0	0		0	0.5	0	1	High Conservation Value (HCV): An area that has a biological, ecological, social or cultural value of outstanding significance or critical importance as follows, such as: • Areas with species diversity, concentrations of biological diversity including endemic species, and rare, threatened or endangered species, that are significant at global, regional or national levels • Areas with landscape-lev…	0.5
	Criteria to ensure adherence to national conventions and legislation on deforestation	1	0.5	0.25	10.1: Areas of native vegetation and other high conservation value areas, cleared after 2004 cannot not be converted into agricultural areas or used for industrial or other commercial purposes, in particular the following: Primary Forests (i.e. rainforests); Riparian Vegetation; Wetlands; Swamps; Floodplains; Steep slopes; Other high conservation value areas • 10.1.1 (additional criterion): Certi…	0.75	1	0.5	0.25	4.1: similar to criterion 10.1 of version 2.9.5: Land conversion: • 4.1.2 (additional criterion): Certified organisations shall adhere to governmental regulations and international conventions that pose additional limits on conversion of native vegetation to agricultural or other commercial purposes.	0.75	1	0.5	0.25	4.1: similar to criterion 4.1 of version 3.0: • 4.1.2 (core criterion): Certified organisations shall adhere to governmental regulations and international conventions that pose additional limits on conversion of native vegetation to agricultural or other commercial purposes.	0.75
Conservation and restoration of natural ecosystems	Environmental impact assessment for production activities	1	0.5	0.25	7.1 (complementary criterion): Certified organizations shall conduct and document an assessment of their impact on the local community and, if present, indigenous people. This shall be updated yearly. 9.1 (complementary criterion): Certified organizations shall perform a comprehensive social and environmental impact assessment (SEIA) to identify potentially harmful or damaging impacts of the oper…	0.75	1	0.5	0.25	4.3: similar to criterion 9.1 of version 2.9.5: Social and environmental impact assessment and management plan: • 4.3.1 (additional criterion): Certified organizations shall perform a comprehensive Environmental and Social Impact Assessment (ESIA) for new large or high risk greenfield expansion or projects and infrastructure to identify potentially harmful or damaging impacts and to define a Mana…	0.75	1	0.75	0.25	4.3: similar to criterion 4.3 of version 3.0: • 4.3.1 (core criterion now): addition of: “External experts are to be involved”. • 4.3.2: more elaborated: Certified organizations that fall within the requirements of 4.3.1 shall carry out the Management Plan specified in that indicator and review it prior to the ProTerra audit, assessing progress, revising and setting new objectives, as appropriate…	1
	Criteria to enhance conservation of natural ecosystems	1	0.5	0.25	10.2 (complementary criterion): Part of the environmental impact assessment described in 9.1 will be to develop, document, and implement a plan to maintain and maximize biodiversity within and surrounding the operation, which will be updated yearly. • 10.2.1 (complementary criterion): Certified organizations shall maintain or restore areas of natural vegetation around bodies of water and on steep…	0.75	1	0.5	0.25	4.2: similar to criterion 10.2 of version 2.9.5: Maintenance and maximization of biodiversity • 4.2.1 (additional criterion): similar to indicator 10.2.1 of version 2.9.5 • 4.2.2 (additional criterion): Certified organizations shall gather wild species or products from their natural habitat only when permitted by law and shall do so only in a manner that assures those species will continue to flo…	0.75	1	0.75	0.25	4.2: similar to criterion 4.2 of version 3.0: • 4.2.1 (core criterion now): more elaborated: Certified organizations shall identify and maintain valuable biodiversity within their areas and shall, with the involvement of an external expert, restore areas of natural vegetation around bodies of water and on steep slopes and hills, and other sensitive parts of the ecosystem. • 4.2.2 (additional crit…	1
	Criteria on restoration of negative impact from production activities on the natural ecosystem	1	0.5	0.25	10.2 (complementary criterion): Part of the environmental impact assessment described in 9.1 will be to develop, document, and implement a plan to maintain and maximize biodiversity within and surrounding the operation, which will be updated yearly. • 10.2.1 (complementary criterion): Certified organizations shall maintain or restore areas of natural vegetation around bodies of water and on steep…	0.75	1	0.5	0.25	4.2: similar to criterion 10.2 of version 2.9.5: Maintenance and maximization of biodiversity • 4.2.1 (additional criterion): similar to indicator 10.2.1 of version 2.9.5 • 4.2.2 (additional criterion): Certified organizations shall gather wild species or products from their natural habitat only when permitted by law and shall do so only in a manner that assures those species will continue to flo…	0.75	1	0.75	0.25	4.2: similar to criterion 4.2 of version 3.0: • 4.2.1 (core criterion now): more elaborated: Certified organizations shall identify and maintain valuable biodiversity within their areas and shall, with the involvement of an external expert, restore areas of natural vegetation around bodies of water and on steep slopes and hills, and other sensitive parts of the ecosystem. • 4.2.2 (additional crit…	1
Location and land rights	Delineation of farm boundaries	0	0	0		0	0	0	0		0	0	0	0		0
	Land title and legal use rights	1	0.75	0.25	7.1 (complementary criterion): Certified organizations shall conduct and document an assessment of their impact on the local community and, if present, indigenous people. This shall be updated yearly. 8.1 (core criterion): Land used by the certified organization does not impair the legal or customary rights of other users, including indigenous communities. • 8.1.1 (complementary criterion): The c…	1	1	0.75	0.25	3.2: similar to criterion 8.2 of version 2.9.5: Land use does not impair the rights of traditional other users: • 3.2.1 (additional criterion): Land use in all cases shall not interfere with the agricultural production systems of neighbors, so as to allow coexistence of different production systems. • 3.2.2 (core criterion): - Land rights disputes shall be resolved before certified status can be …	1	1	0.75	0.25	3.2: similar to criterion 3.2 of version 3.0 • 3.2.1 (core criterion now): addition of: The UN Principle of free, prior and informed consent (FPIC) shall apply to this indicator. • 3.2.1 (additional criterion now)	1
	Criteria on the protection of local and indigenous rights	1	0.75	0	7.1 (complementary criterion): Certified organizations shall conduct and document an assessment of their impact on the local community and, if present, indigenous people. This shall be updated yearly. 8.1 (core criterion): Land used by the certified organization does not impair the legal or customary rights of other users, including indigenous communities. • 8.1.1 (complementary criterion): The c…	0.75	1	0.75	0	3.2: similar to criterion 8.2 of version 2.9.5: Land use does not impair the rights of traditional other users: • 3.2.1 (additional criterion): Land use in all cases shall not interfere with the agricultural production systems of neighbors, so as to allow coexistence of different production systems. • 3.2.2 (core criterion): - Land rights disputes shall be resolved before certified status can be …	0.75	1	0.75	0	3.2: similar to criterion 3.2 of version 3.0 • 3.2.1 (core criterion now): addition of: The UN Principle of free, prior and informed consent (FPIC) shall apply to this indicator. • 3.2.1 (additional criterion now)	0.75
Sustainable land use practices	Criteria to promote agroforestry	0	0	0		0	0	0	0		0	0	0	0		0
					Average:	0.553571				Average:	0.553571				Average:	0.642857
VSS		RTRS
Standard version		2010					2013					2016
Topic	Attribute name	DS score	Criticality	Explicitness	Excerpt	Final score	DS score	Criticality	Explicitness	Excerpt	Final score	DS score	Criticality	Explicitness	Excerpt	Final score
Deforestation Prevention	Prohibition of secondary or natural forest conversion	0	0	0		0	0	0	0		0	0	0	0		0
	Prohibition of primary forest conversion	1	0.5	0.25	4.4: Expansion of soy cultivation is responsible. • 4.4.1: After May 2009 expansion for soy cultivation has not taken place on land cleared of native habitat except under the following conditions: * 4.4.1.1 It is in line with an RTRS-approved map and system (see Annex 4.) or * 4.4.1.2 Where no RTRS-approved map and system is available: • a) Any area already cleared for agriculture or pasture befo…	0.75	1	0.5	0.25	4.4: cf. criterion 4.4 of version 1.0	0.75	1	0.5	0.25	4.4: cf. criterion 4.4 of version 1.0 with the following adaptations: • 4.4.1: The following areas have not been cleared or converted from May 2009 onwards: * a) Where RTRS maps are available: All areas included in Category 1 of the maps. * b) Where RTRS maps are not available the following areas: native forests, riparian vegetation, natural wetlands, steep slopes, areas designated by law to serv…	0.75
	Prohibition of production in HCV or HCS areas	1	0.5	0.25	4.4: Expansion of soy cultivation is responsible. • 4.4.1: After May 2009 expansion for soy cultivation has not taken place on land cleared of native habitat except under the following conditions: * 4.4.1.1 It is in line with an RTRS-approved map and system (see Annex 4.) or * 4.4.1.2 Where no RTRS-approved map and system is available: • a) Any area already cleared for agriculture or pasture befo…	0.75	1	0.5	0.25	4.4: cf. criterion 4.4 of version 1.0	0.75	1	0.5	0.25	4.4: cf. criterion 4.4 of version 1.0 with the following adaptations: • 4.4.1: The following areas have not been cleared or converted from May 2009 onwards: * a) Where RTRS maps are available: All areas included in Category 1 of the maps. * b) Where RTRS maps are not available the following areas: native forests, riparian vegetation, natural wetlands, steep slopes, areas designated by law to serv…	0.75
	Prohibition of production in protected areas	0	0	0		0	0	0	0		0	0	0	0		0
	Criteria including a cut-off date to prohibit deforestation	1	0.5	0.25	4.4: Expansion of soy cultivation is responsible. • 4.4.1: After May 2009 expansion for soy cultivation has not taken place on land cleared of native habitat except under the following conditions: * 4.4.1.1 It is in line with an RTRS-approved map and system (see Annex 4.) or * 4.4.1.2 Where no RTRS-approved map and system is available: • a) Any area already cleared for agriculture or pasture befo…	0.75	1	0.5	0.25	4.4: cf. criterion 4.4 of version 1.0	0.75	1	0.5	0.25	4.4: cf. criterion 4.4 of version 1.0 with the following adaptations: • 4.4.1: The following areas have not been cleared or converted from May 2009 onwards: * a) Where RTRS maps are available: All areas included in Category 1 of the maps. * b) Where RTRS maps are not available the following areas: native forests, riparian vegetation, natural wetlands, steep slopes, areas designated by law to serv…	0.75
	Clear definition of forest types that may not be converted	0.5	0	1	High Conservation Value Areas: High Conservation Value Areas are critical areas in a landscape which need to be appropriately managed in order to maintain or enhance High Conservation Values (HCVs). There are six main types of HCV Area. Based on the definition originally developed by the Forest Stewardship Council for certification of forest ecosystems, but now increasingly expanded to apply to o…	0.5	0.5	0	1	Cf. version 1.0	0.5	0.5	0	1	High Conservation Value Areas: is a biological, ecological, social or cultural value of outstanding significance or critical importance. There are six categories of HCV. • HCV1. Concentrations of biological diversity including endemic species, and rare, threatened or endangered species, significant at global, regional or national levels. • HCV2. Intact forest landscapes and large landscape-level …	0.5
	Criteria to ensure adherence to national conventions and legislation on deforestation	1	0.5	0.25	1.1 There is awareness of, and compliance with, all applicable local and national legislation. Note: For group certification of small farms - group managers should provide training for group members on applicable laws and legal compliance. 1.1.1 Awareness of responsibilities, according to applicable laws can be demonstrated. 1.1.2 Applicable laws are being complied with.	0.75	1	0.5	0.25	1.1: cf. criterion 1.1 of version 1.0	0.75	1	0.5	0.25	1.1: cf. criterion 1.1 of version 1.0	0.75
Conservation and restoration of natural ecosystems	Environmental impact assessment for production activities	1	0.5	0.25	4.1: On and off site social and environmental impacts of large or high risk new infrastructure have been assessed and appropriate measures taken to minimize and mitigate any negative impacts. • 4.1.1: A social and environmental assessment is carried out prior to the establishment of large or high risk new infrastructure. • 4.1.2: The assessment is carried out by someone who is adequately trained …	0.75	1	0.5	0.25	4.1: cf. criterion 4.1 of version 1.0	0.75	1	0.5	0.25	4.1: cf. criterion 3.2 of version 1.0 with the following adaptations: • 4.1.1: An initial social and environmental assessment is carried out prior to the first certification audit (see also Indicator 1.3.1) instead of prior to the establishment of large or high risk new infrastructure. • 4.1.4: … and monitored. • 4.1.5: A summary of the social and environmental assessment report shall be made.	0.75
	Criteria to enhance conservation of natural ecosystems	1	0.5	0.25	4.5: On-farm biodiversity is maintained and safeguarded through the preservation of native vegetation. • 4.5.1: There is a map of the farm which shows the native vegetation. • 4.5.2: There is a plan, which is being implemented, to ensure that the native vegetation is being maintained (except areas covered under Criterion 4.4). • 4.5.3: No hunting of rare, threatened or endangered species takes pl…	0.75	1	0.5	0.25	4.5: cf. criterion 4.5 of version 1.0	0.75	0.5	0.5	0.25	4.5: cf. criterion 4.5 of version 1.0 with the following adaptations: • 4.5.1: also for production areas and water courses • 4.5.2: similar • 4.5.3: Rare, threatened or endangered species permanently or temporary present at the property are protected. Hunting or collecting ofthese species is not allowed. • 4.5.4: 4 For farms that have less than 10% of native vegetation (but in compliance with 4.4…	0.375
	Criteria on restoration of negative impact from production activities on the natural ecosystem	0	0	0		0	0	0	0		0	0.5	0.5	0.25	4.5: cf. criterion 4.5 of version 1.0 with the following adaptations: • 4.5.1: also for production areas and water courses • 4.5.2: similar • 4.5.3: Rare, threatened or endangered species permanently or temporary present at the property are protected. Hunting or collecting ofthese species is not allowed. • 4.5.4: 4 For farms that have less than 10% of native vegetation (but in compliance with 4.4…	0.375
Location and land rights	Delineation of farm boundaries	1	0.5	0	4.4: Expansion of soy cultivation is responsible. • 4.4.1: After May 2009 expansion for soy cultivation has not taken place on land cleared of native habitat except under the following conditions: * 4.4.1.1 It is in line with an RTRS-approved map and system (see Annex 4.) or * 4.4.1.2 Where no RTRS-approved map and system is available: • a) Any area already cleared for agriculture or pasture befo…	0.5	1	0.5	0	4.4: cf. criterion 4.4 of version 1.0	0.5	1	0.5	0	4.4: cf. criterion 4.4 of version 1.0 with the following adaptations: • 4.4.1: The following areas have not been cleared or converted from May 2009 onwards: * a) Where RTRS maps are available: All areas included in Category 1 of the maps. * b) Where RTRS maps are not available the following areas: native forests, riparian vegetation, natural wetlands, steep slopes, areas designated by law to serv…	0.5
	Land title and legal use rights	1	0.5	0.25	1.2: Legal use rights to the land are clearly defined and demonstrable • 1.2.1: There is documented evidence of rights to use the land (e.g. ownership document, rental agreement, court order etc.). 3.2: In areas with traditional land users, conflicting land uses are avoided or resolved. • 3.2.1: In the case of disputed use rights, a comprehensive, participatory and documented community rights ass…	0.75	1	0.5	0.25	1.2: cf. criterion 1.2 of version 1.0 3.2: cf. criterion 3.2 of version 1.0 4.4: cf. criterion 4.4 of version 1.0	0.75	1	0.5	0.25	1.2: cf. criterion 1.2 of version 1.0 3.2: cf. criterion 3.2 of version 1.0 with the addition of the following indicators: • 3.2.3: Producers are required to respect the rights, customs and culture of indigenous peoples as defined in the United Nations Declaration on the Rights of Indigenous Peoples (2007) and ILO Convention 169 (1989). • 3.2.4: Sites of special cultural, ecological, economic or …	0.75
	Criteria on the protection of local and indigenous rights	1	0.5	0	1.2: Legal use rights to the land are clearly defined and demonstrable • 1.2.1: There is documented evidence of rights to use the land (e.g. ownership document, rental agreement, court order etc.). 3.2: In areas with traditional land users, conflicting land uses are avoided or resolved. • 3.2.1: In the case of disputed use rights, a comprehensive, participatory and documented community rights ass…	0.5	1	0.5	0	1.2: cf. criterion 1.2 of version 1.0 3.2: cf. criterion 3.2 of version 1.0 4.4: cf. criterion 4.4 of version 1.0	0.5	1	0.5	0	1.2: cf. criterion 1.2 of version 1.0 3.2: cf. criterion 3.2 of version 1.0 with the addition of the following indicators: • 3.2.3: Producers are required to respect the rights, customs and culture of indigenous peoples as defined in the United Nations Declaration on the Rights of Indigenous Peoples (2007) and ILO Convention 169 (1989). • 3.2.4: Sites of special cultural, ecological, economic or …	0.5
Sustainable land use practices	Criteria to promote agroforestry	0	0	0		0	0	0	0		0	0	0	0		0
					Average:	0.482143				Average:	0.482143				Average:	0.482143
VSS		Bonsucro production standard										Bonsucro smallholder standard
Standard version		2011					2014					2018
Topic	Attribute name	DS score	Criticality	Explicitness	Excerpt	Final score	DS score	Criticality	Explicitness	Excerpt	Final score	DS score	Criticality	Explicitness	Excerpt	Final score
Deforestation Prevention	Prohibition of secondary or natural forest conversion	0	0	0		0	0	0	0		0	0	0	0		0
	Prohibition of primary forest conversion	0	0	0		0	0	0	0		0	0	0	0		0
	Prohibition of production in HCV or HCS areas	1	0.75	0.25	4.1 (core criterion): To assess impacts of sugarcane enterprises on biodiversity and ecosystem services. • Indicator: Zero percent of areas defined internationally or nationally as legally protected or classified as High Conservation Value areas (interpreted nationally and officially described in the guidance document, categories 1-4) planted to sugarcane after the cut-off date of 1 January 2008.	1	1	0.75	0.25	4.1: cf. criterion 4.1 of version 3.0 with the following adaptations: • Indicator 4.1.2 (core indicator): Zero percent of areas defined internationally or nationally as legally protected or classified as High Conservation Value areas (interpreted nationally and officially described in the guidance document, categories 1-6) planted to sugarcane after the cut-off date of 1 January 2008.	1	1	0.75	0.25	4.1: To assess impacts of sugarcane enterprises on biodiversity and ecosystem services. • Indicator 4.1.2 (core indicator): Zero percent of areas defined internationally or nationally as legally protected or classified as High Conservation Value areas (interpreted nationally and officially described in the guidance document, categories 1-6) planted to sugarcane five years prior to the date of inc…	1
	Prohibition of production in protected areas	1	0.75	0.25	4.1 (core criterion): To assess impacts of sugarcane enterprises on biodiversity and ecosystem services. • Indicator: Zero percent of areas defined internationally or nationally as legally protected or classified as High Conservation Value areas (interpreted nationally and officially described in the guidance document, categories 1-4) planted to sugarcane after the cut-off date of 1 January 2008.	1	1	0.75	0.25	4.1: cf. criterion 4.1 of version 3.0 with the following adaptations: • Indicator 4.1.2 (core indicator): Zero percent of areas defined internationally or nationally as legally protected or classified as High Conservation Value areas (interpreted nationally and officially described in the guidance document, categories 1-6) planted to sugarcane after the cut-off date of 1 January 2008.	1	1	0.75	0.25	4.1: To assess impacts of sugarcane enterprises on biodiversity and ecosystem services. • Indicator 4.1.2 (core indicator): Zero percent of areas defined internationally or nationally as legally protected or classified as High Conservation Value areas (interpreted nationally and officially described in the guidance document, categories 1-6) planted to sugarcane five years prior to the date of inc…	1
	Criteria including a cut-off date to prohibit deforestation	1	0.75	0.25	4.1 (core criterion): To assess impacts of sugarcane enterprises on biodiversity and ecosystem services. • Indicator: Zero percent of areas defined internationally or nationally as legally protected or classified as High Conservation Value areas (interpreted nationally and officially described in the guidance document, categories 1-4) planted to sugarcane after the cut-off date of 1 January 2008.	1	1	0.75	0.25	4.1: cf. criterion 4.1 of version 3.0 with the following adaptations: • Indicator 4.1.2 (core indicator): Zero percent of areas defined internationally or nationally as legally protected or classified as High Conservation Value areas (interpreted nationally and officially described in the guidance document, categories 1-6) planted to sugarcane after the cut-off date of 1 January 2008.	1	1	0.75	0.25	4.1: To assess impacts of sugarcane enterprises on biodiversity and ecosystem services. • Indicator 4.1.2 (core indicator): Zero percent of areas defined internationally or nationally as legally protected or classified as High Conservation Value areas (interpreted nationally and officially described in the guidance document, categories 1-6) planted to sugarcane five years prior to the date of inc…	1
	Clear definition of forest types that may not be converted	0.5	0	1	Land with high biodiversity value: Land that had one of the following statuses in or after January 2008, whether or not the land continues to have that status: • Primary forest and other primary wooded land, namely forest and the ecological processes are not significantly disturbed; • Areas designated by law or by the relevant competent authority for nature protection purposes; or for the protect…	0.5	0.5	0	1	High Conservation Value (HCV) areas: cf. version 2011	0.5	1	0	1	High Conservation Value (HCV) areas: biological, ecological, social or cultural values which are considered outstandingly significant or critically important, at the national, regional or global level. All natural habitats possess some inherent conservation values, including the presence of rare or endemic species, provision of ecosystem services, sacred sites, or resources harvested by local res…	1
	Criteria to ensure adherence to national conventions and legislation on deforestation	1	0.75	0.25	1.1: To comply with relevant applicable laws.	1	1	0.75	0.25	1.1: To comply with relevant applicable laws.	1	1	0.75	0.25	1.1 To comply with applicable laws • Indicator 1.1.1 (core indicator): Compliance with the law.	1
Conservation and restoration of natural ecosystems	Environmental impact assessment for production activities	1	0.75	0.25	4.1 (core criterion): To assess impacts of sugarcane enterprises on biodiversity and ecosystem services. • Indicator: Existence and implementation of an environmental management plan taking into account endangered species, habitats and ecosystems as well as reference to ecosystem services and alien invader plant and animal control. Coverage of issues required are noted in the guidance document. E…	1	1	0.75	0	4.1: cf. criterion 4.1 of version 3.0 with the following adaptations: • Indicator 4.1.3 (core indicator): The key environmental issues (>90% coverage) are covered by an appropriate and implemented environmental impact and management plan (EIMP). Environmental issues: biodiversity, ecosystem services, soil, water, air, climate change, use of crop protection chemicals, use of artificial fertilizers…	0.75	1	0.75	0	4.1: To assess impacts of sugarcane enterprises on biodiversity and ecosystem services. • Indicator 4.1.3 (core indicator): The key environmental issues are covered by an appropriate and implemented environmental impact and management plan (EIMP). Environmental issues: impact on soil, impact on water, use of Integrated Pest Management, use of artificial fertilizers and cane burning 5.7: For green…	0.75
	Criteria to enhance conservation of natural ecosystems	1	0.5	0.25	4.2: To implement measures to mitigate adverse impacts where identified. • Indicator: Documented plan and implementation of mitigation measures. 6.2: To protect land with high biodiversity value, land with high carbon stock and peatlands. • Indicator: 0% of land with high biodiversity value, high carbon stock or peatlands planted to sugarcane after the cut-off date of 1 January 2008.	0.75	1	0.75	0	4.1: cf. criterion 4.1 of version 3.0 with the following adaptations: • Indicator 4.1.3 (core indicator): The key environmental issues (>90% coverage) are covered by an appropriate and implemented environmental impact and management plan (EIMP). Environmental issues: biodiversity, ecosystem services, soil, water, air, climate change, use of crop protection chemicals, use of artificial fertilizers…	0.75	1	0.75	0	4.1: To assess impacts of sugarcane enterprises on biodiversity and ecosystem services. • Indicator 4.1.3 (core indicator): The key environmental issues are covered by an appropriate and implemented environmental impact and management plan (EIMP). Environmental issues: impact on soil, impact on water, use of Integrated Pest Management, use of artificial fertilizers and cane burning	0.75
	Criteria on restoration of negative impact from production activities on the natural ecosystem	1	0.5	0.25	4.2: To implement measures to mitigate adverse impacts where identified. • Indicator: Documented plan and implementation of mitigation measures.	0.75	0	0	0		0	0	0	0		0
Location and land rights	Delineation of farm boundaries	0	0	0		0	0	0	0		0	0	0	0		0
	Land title and legal use rights	1	0.5	0.25	1.2: To demonstrate clear title to land in accordance with national practice and law. • Indicator: The right to use the land can be demonstrated and is not legitimately contested by local communities with demonstrable rights.	0.75	1	0.75	0.25	1.2: cf. criterion 1.2 of version 3.0 with the following adaptations: reference to water titles as well • Indicator 1.2.1 (core indicator): The right to use the land and water can be demonstrated • Indicator 1.2.2: 0 ha land that is not legitimately contested by other users. • Indicator 1.2.3: 0 m³ water that is legitimately contested by other users.	1	1	0.75	0.25	1.2: To demonstrate clear title to land and water in accordance with national practice and law: • 1.2.1 (core indicator): The right to use land and water can be demonstrated	1
	Criteria on the protection of local and indigenous rights	0	0	0		0	0	0	0		0	0	0	0		0
Sustainable land use practices	Criteria to promote agroforestry	0	0	0		0	0	0	0		0	0	0	0		0
					Average:	0.553571				Average:	0.5				Average:	0.535714
VSS		AWS
Standard version		2014					2019
Topic	Attribute name	DS score	Criticality	Explicitness	Excerpt	Final score	DS score	Criticality	Explicitness	Excerpt	Final score
Deforestation Prevention	Prohibition of secondary or natural forest conversion	0	0	0		0	0	0	0		0
	Prohibition of primary forest conversion	0	0	0		0	0	0	0		0
	Prohibition of production in HCV or HCS areas	1	0.75	0	4.4 (core criterion): Maintain or improve the status of the site’s Important Water-Related Areas: Meet the site’s targets for Important Water-Related Areas at the site. As noted in Criterion 3.2., where Important Water-Related Area degradation is a shared water challenge, the site must also continually improve its Important Water-Related efforts until best practices are met, and the site must not…	0.75	1	0.75	0	3.5: Implement plan to maintain or improve the site’s and/or catchment’s Important Water-Related Areas. • 3.5.1 (core indicator): Practices set in the water stewardship plan to maintain and/or enhance the site’s Important Water-Related Areas shall be implemented. • 3.5.2 (advanced indicator): Evidence of completed restoration of non-functioning or severely degraded Important Water-Related Areas i…	0.75
	Prohibition of production in protected areas	0	0	0		0	0	0	0		0
	Criteria including a cut-off date to prohibit deforestation	0	0	0		0	0	0	0		0
	Clear definition of forest types that may not be converted	0.5	0	1	Important water-related area (IWRA): The specific water-related areas of a catchment that, if impaired or lost, would adversely impact the environmental, social, cultural or economic benefits derived from the catchment in a significant or disproportionate manner. Important Water-Related Areas are deemed “important” either by local stakeholders or by key stakeholders at regional or international l…	0.5	0.5	0	1	Important water-related area (IWRA): cf. version 1.0	0.5
	Criteria to ensure adherence to national conventions and legislation on deforestation	0	0	0	4.1 (core criterion): Comply with water-related legal and regulatory requirements	0	0	0	0	5.1: Disclose water-related internal governance of the site’s management, including the positions of those accountable for legal compliance with water-related local laws and regulations. • 5.1.1 (core indicator): The site’s water-related internal governance, including positions of those accountable for compliance with water-related laws and regulations shall be disclosed	0
Conservation and restoration of natural ecosystems	Environmental impact assessment for production activities	0	0	0		0	0	0	0		0
	Criteria to enhance conservation of natural ecosystems	1	0.75	0	4.4 (core criterion): Maintain or improve the status of the site’s Important Water-Related Areas: Meet the site’s targets for Important Water-Related Areas at the site. As noted in Criterion 3.2., where Important Water-Related Area degradation is a shared	0.75	1	0.75	0	3.5: Implement plan to maintain or improve the site’s and/or catchment’s Important Water-Related Areas. • 3.5.1 (core indicator): Practices set in the water stewardship plan to maintain and/or enhance the site’s Important Water-Related Areas shall be implemented. • 3.5.2 (advanced indicator): Evidence of completed restoration of non-functioning or severely degraded Important Water-Related Areas i…	0.75
	Criteria on restoration of negative impact from production activities on the natural ecosystem	1	0.25	0	4.11 (advanced criterion): Achieve best practice results on Important Water-Related Areas through restoration: Achieve best practice results with respect to the site’s Important Water-Related targets and complete restoration of non-functioning or severely degraded Important Water-Related Areas as informed by stakeholder consensus or credible expert opinion. • 4.1.1: Evidence of completed restorat…	0.25	1	0.25	0	3.5: Implement plan to maintain or improve the site’s and/or catchment’s Important Water-Related Areas. • 3.5.1 (core indicator): Practices set in the water stewardship plan to maintain and/or enhance the site’s Important Water-Related Areas shall be implemented. • 3.5.2 (advanced indicator): Evidence of completed restoration of non-functioning or severely degraded Important Water-Related Areas i…	0.25
Location and land rights	Delineation of farm boundaries	1	0.75	0	2.1 (core criterion): Define the physical scope: Identify the site’s operational boundaries, the sources the site draws its water from, the locations where the site returns its discharge to, and the catchment(s) that the site affect(s) and is reliant upon. • 2.1.1: Documentation or map of the site’s boundaries. 2.3 (core criterion): Gather water-related data for the catchment: Gather credible and…	0.75	1	0.75	0	1.1: Gather information to define the site’s physical scope for water stewardship purposes, including: its operational boundaries; the water sources from which the site draws; the locations to which the site returns its discharges; and the catchment(s) that the site affect(s) and upon which it is reliant. 1.3: Gather water-related data for the site, including: water balance; water quality, Import…	0.75
	Land title and legal use rights	1	0.75	0.25	2.3 (core criterion): 2.3 Gather water-related data for the catchment: Gather credible and temporally relevant data on the site’s catchment: • 2.3.2: List, and description of relevance, of all applicable water-related legal and regulatory requirements, including legally defined and customary water rights and water-use rights	1	1	0.75	0.25	1.5: Gather water-related data for the catchment, including: water governance, water balance, water quality, Important Water-Related Areas, infrastructure, and WASH • 1.5.2 (core indicator): Applicable water-related legal and regulatory requirements shall be identified, including legally-defined and/or stakeholder-verified customary water rights. 3.1: Implement plan to participate positively in c…	1
	Criteria on the protection of local and indigenous rights	0	0	0		0	0	0	0		0
Sustainable land use practices	Criteria to promote agroforestry	0	0	0		0	0	0	0		0
					Average:	0.285714				Average:	0.285714
VSS		PU
Standard version		2012-2019: not available					2019
Topic	Attribute name	Score	Criticality	Explicitness	Excerpt	Final score	Score	Criticality	Explicitness	Excerpt	Final score
Deforestation Prevention	Prohibition of secondary or natural forest conversion					0	1	0.5	0	7.5: Conservation and restoration plan: The Entity should promote good practices in managing the landscape and biodiversity of the surrounding environment. There should be conservation and restoration of natural habitat within the region/country where the cocoa production takes place. The Entity should encourage the rehabilitation of trees, through communication about the agricultural best practi…	0.5
	Prohibition of primary forest conversion					0	1	0.5	0	7.5: Conservation and restoration plan: The Entity should promote good practices in managing the landscape and biodiversity of the surrounding environment. There should be conservation and restoration of natural habitat within the region/country where the cocoa production takes place. The Entity should encourage the rehabilitation of trees, through communication about the agricultural best practi…	0.5
	Prohibition of production in HCV or HCS areas					0	0	0	0		0
	Prohibition of production in protected areas					0	0	0	0		0
	Criteria including a cut-off date to prohibit deforestation					0	0	0	0		0
	Clear definition of forest types that may not be converted					0	0	0	0		0
	Criteria to ensure adherence to national conventions and legislation on deforestation					0	0	0	0		0
Conservation and restoration of natural ecosystems	Environmental impact assessment for production activities					0	0	0	0		0
	Criteria to enhance conservation of natural ecosystems					0	1	0.5	0	7.5: Conservation and restoration plan: The Entity should promote good practices in managing the landscape and biodiversity of the surrounding environment. There should be conservation and restoration of natural habitat within the region/country where the cocoa production takes place. The Entity should encourage the rehabilitation of trees, through communication about the agricultural best practi…	0.5
	Criteria on restoration of negative impact from production activities on the natural ecosystem					0	1	0.5	0	7.5: Conservation and restoration plan: The Entity should promote good practices in managing the landscape and biodiversity of the surrounding environment. There should be conservation and restoration of natural habitat within the region/country where the cocoa production takes place. The Entity should encourage the rehabilitation of trees, through communication about the agricultural best practi…	0.5
Location and land rights	Delineation of farm boundaries					0	1	0.5	0.25	2.2: Traceability management • 2.2.1: Data collection on location	0.75
	Land title and legal use rights					0	1	0.5	0.25	1.2: Property rights/ownership: All levels should comply with local and national laws relating to environmental protection. The evaluation should assess evidence that proves compliance with applicable environmental regulations. The Entity is responsible for recording and cross-referencing production locations in order to avoid sourcing from protected forests and lands. This must be supported with…	0.75
	Criteria on the protection of local and indigenous rights					0	0	0	0		0
Sustainable land use practices	Criteria to promote agroforestry					0	0	0	0		0
					Average:	0				Average:	0.25

## Sheet: Final results
VSS	Year	Substantive_score
RA	2012	0.696429
RA	2013	0.696429
RA	2014	0.696429
RA	2015	0.696429
RA	2016	0.696429
RA	2017	0.964286
RA	2018	0.964286
RA	2019	0.964286
RA	2020	0.794643
RSPO	2012	0.821429
RSPO	2013	0.821429
RSPO	2014	0.821429
RSPO	2015	0.821429
RSPO	2016	0.821429
RSPO	2017	0.821429
RSPO	2018	0.78125
RSPO	2019	0.78125
RSPO	2020	0.78125
FI	2012	0.294643
FI	2013	0.294643
FI	2014	0.342262
FI	2015	0.342262
FI	2016	0.342262
FI	2017	0.342262
FI	2018	0.342262
FI	2019	0.404762
FI	2020	0.404762
UTZ	2012	0.5
UTZ	2013	0.5
UTZ	2014	0.553571
UTZ	2015	0.553571
UTZ	2016	0.553571
UTZ	2017	0.553571
UTZ	2018	0.553571
UTZ	2019	0.553571
UTZ	2020	0.794643
FC	2012	0.232143
FC	2013	0.232143
FC	2014	0.232143
FC	2015	0.642857
FC	2016	0.642857
FC	2017	0.642857
FC	2018	0.642857
FC	2019	0.642857
FC	2020	0.660714
OR	2012	0.321429
OR	2013	0.321429
OR	2014	0.321429
OR	2015	0.321429
OR	2016	0.321429
OR	2017	0.321429
OR	2018	0.321429
OR	2019	0.321429
OR	2020	0.321429
GG	2012	0.535714
GG	2013	0.571429
GG	2014	0.571429
GG	2015	0.571429
GG	2016	0.571429
GG	2017	0.571429
GG	2018	0.571429
GG	2019	0.571429
GG	2020	0.571429
PT	2012	0.553571
PT	2013	0.553571
PT	2014	0.553571
PT	2015	0.553571
PT	2016	0.553571
PT	2017	0.553571
PT	2018	0.642857
PT	2019	0.642857
PT	2020	0.642857
RTRS	2012	0.482143
RTRS	2013	0.482143
RTRS	2014	0.482143
RTRS	2015	0.482143
RTRS	2016	0.482143
RTRS	2017	0.482143
RTRS	2018	0.482143
RTRS	2019	0.482143
RTRS	2020	0.482143
BS	2012	0.553571
BS	2013	0.553571
BS	2014	0.5
BS	2015	0.5
BS	2016	0.5
BS	2017	0.5
BS	2018	0.517857
BS	2019	0.517857
BS	2020	0.517857
AWS	2012	0
AWS	2013	0
AWS	2014	0.285714
AWS	2015	0.285714
AWS	2016	0.285714
AWS	2017	0.285714
AWS	2018	0.285714
AWS	2019	0.285714
AWS	2020	#REF!
PU	2012	0
PU	2013	0
PU	2014	0.25
PU	2015	0.25
PU	2016	0.25
PU	2017	0.25
PU	2018	0.25
PU	2019	0.25
PU	2020	0.25

## Sheet: Restructured results
VSS	Year	Prohibition of secondary or natural forest conversion	Prohibition of primary forest conversion	Prohibition of production in HCV or HCS areas	Prohibition of production in protected areas	Criteria including a cut-off date to prohibit deforestation	Clear definition of forest types that may not be converted	Criteria to ensure adherence to national conventions and legislation on deforestation	Environmental impact assessment for production activities	Criteria to enhance conservation of natural ecosystems	Criteria on restoration of negative impact from production activities on the natural ecosystem	Delineation of farm boundaries	Land title and legal use rights	Criteria on the protection of local and indigenous rights	Criteria to promote agroforestry
RA	2012	1	1	1	0	0.75	1	0.75	0.75	1	1	0	0.75	0	0.75
RA	2013	1	1	1	0	0.75	1	0.75	0.75	1	1	0	0.75	0	0.75
RA	2014	1	1	1	0	0.75	1	0.75	0.75	1	1	0	0.75	0	0.75
RA	2015	1	1	1	0	0.75	1	0.75	0.75	1	1	0	0.75	0	0.75
RA	2016	1	1	1	0	0.75	1	0.75	0.75	1	1	0	0.75	0	0.75
RA	2017	1	1	1	1	1	1	1	1	1	0.75	1	1	1	0.75
RA	2018	1	1	1	1	1	1	1	1	1	0.75	1	1	1	0.75
RA	2019	1	1	1	1	1	1	1	1	1	0.75	1	1	1	0.75
RA	2020	0.5	0.5	0.375	0.5	1	1	1	1	1	0.75	0.5	1	1	1
RSPO	2012	0	1	1	0.75	1	1	1	1	0.75	1	1	1	1	0
RSPO	2013	0	1	1	0.75	1	1	1	1	0.75	1	1	1	1	0
RSPO	2014	0	1	1	0.75	1	1	1	1	0.75	1	1	1	1	0
RSPO	2015	0	1	1	0.75	1	1	1	1	0.75	1	1	1	1	0
RSPO	2016	0	1	1	0.75	1	1	1	1	0.75	1	1	1	1	0
RSPO	2017	0	1	1	0.75	1	1	1	1	0.75	1	1	1	1	0
RSPO	2018	0	0.375	1	1	1	1	1	1	1	1	1	1	1	0
RSPO	2019	0	0.375	1	1	1	1	1	1	1	1	1	1	1	0
RSPO	2020	0	0.375	1	1	1	1	1	1	1	1	1	1	1	0
FI	2012	0	0	0.75	0.75	0	1	1	0	0.25	0.25	0	0	0	0.125
FI	2013	0	0	0.75	0.75	0	1	1	0	0.25	0.25	0	0	0	0.125
FI	2014	0	0	0.75	0.75	0	1	1	0	0.25	0.25	0	0.333333	0.333333	0.125
FI	2015	0	0	0.75	0.75	0	1	1	0	0.25	0.25	0	0.333333	0.333333	0.125
FI	2016	0	0	0.75	0.75	0	1	1	0	0.25	0.25	0	0.333333	0.333333	0.125
FI	2017	0	0	0.75	0.75	0	1	1	0	0.25	0.25	0	0.333333	0.333333	0.125
FI	2018	0	0	0.75	0.75	0	1	1	0	0.25	0.25	0	0.333333	0.333333	0.125
FI	2019	0.25	0.25	0.75	0.75	0	1	1	0	0.25	0.25	0.125	0.583333	0.333333	0.125
FI	2020	0.25	0.25	0.75	0.75	0	1	1	0	0.25	0.25	0.125	0.583333	0.333333	0.125
UTZ	2012	0	1	0	1	1	0.25	0	0.75	0.75	0.5	1	0	0	0.75
UTZ	2013	0	1	0	1	1	0.25	0	0.75	0.75	0.5	1	0	0	0.75
UTZ	2014	0.5	1	0	1	1	0.5	0.75	0.75	0.75	0	1	0.5	0	0
UTZ	2015	0.5	1	0	1	1	0.5	0.75	0.75	0.75	0	1	0.5	0	0
UTZ	2016	0.5	1	0	1	1	0.5	0.75	0.75	0.75	0	1	0.5	0	0
UTZ	2017	0.5	1	0	1	1	0.5	0.75	0.75	0.75	0	1	0.5	0	0
UTZ	2018	0.5	1	0	1	1	0.5	0.75	0.75	0.75	0	1	0.5	0	0
UTZ	2019	0.5	1	0	1	1	0.5	0.75	0.75	0.75	0	1	0.5	0	0
UTZ	2020	0.5	0.5	0.375	0.5	1	1	1	1	1	0.75	0.5	1	1	1
FC	2012	0	0	0	1	0	0	0.75	0	0.75	0	0.75	0	0	0
FC	2013	0	0	0	1	0	0	0.75	0	0.75	0	0.75	0	0	0
FC	2014	0	0	0	1	0	0	0.75	0	0.75	0	0.75	0	0	0
FC	2015	0	1	0.75	1	1	1	1	0	0.75	0.75	0.75	1	0	0
FC	2016	0	1	0.75	1	1	1	1	0	0.75	0.75	0.75	1	0	0
FC	2017	0	1	0.75	1	1	1	1	0	0.75	0.75	0.75	1	0	0
FC	2018	0	1	0.75	1	1	1	1	0	0.75	0.75	0.75	1	0	0
FC	2019	0	1	0.75	1	1	1	1	0	0.75	0.75	0.75	1	0	0
FC	2020	0	1	0.75	1	1	0.5	1	0.5	0.75	0.75	1	1	0	0
OR	2012	0	0	0.75	0	0.75	0.5	0	0	0.75	0.5	0.25	0.25	0.75	0
OR	2013	0	0	0.75	0	0.75	0.5	0	0	0.75	0.5	0.25	0.25	0.75	0
OR	2014	0	0	0.75	0	0.75	0.5	0	0	0.75	0.5	0.25	0.25	0.75	0
OR	2015	0	0	0.75	0	0.75	0.5	0	0	0.75	0.5	0.25	0.25	0.75	0
OR	2016	0	0	0.75	0	0.75	0.5	0	0	0.75	0.5	0.25	0.25	0.75	0
OR	2017	0	0	0.75	0	0.75	0.5	0	0	0.75	0.5	0.25	0.25	0.75	0
OR	2018	0	0	0.75	0	0.75	0.5	0	0	0.75	0.5	0.25	0.25	0.75	0
OR	2019	0	0	0.75	0	0.75	0.5	0	0	0.75	0.5	0.25	0.25	0.75	0
OR	2020	0	0	0.75	0	0.75	0.5	0	0	0.75	0.5	0.25	0.25	0.75	0
GG	2012	1	1	0.5	0	1	0	1	1	0.75	0.5	0.75	0	0	0
GG	2013	1	1	0.5	0	1	0.5	1	1	0.75	0.5	0.75	0	0	0
GG	2014	1	1	0.5	0	1	0.5	1	1	0.75	0.5	0.75	0	0	0
GG	2015	1	1	0.5	0	1	0.5	1	1	0.75	0.5	0.75	0	0	0
GG	2016	1	1	0.5	0	1	0.5	1	1	0.75	0.5	0.75	0	0	0
GG	2017	1	1	0.5	0	1	0.5	1	1	0.75	0.5	0.75	0	0	0
GG	2018	1	1	0.5	0	1	0.5	1	1	0.75	0.5	0.75	0	0	0
GG	2019	1	1	0.5	0	1	0.5	1	1	0.75	0.5	0.75	0	0	0
GG	2020	1	1	0.5	0	1	0.5	1	1	0.75	0.5	0.75	0	0	0
PT	2012	0	1	1	0	1	0	0.75	0.75	0.75	0.75	0	1	0.75	0
PT	2013	0	1	1	0	1	0	0.75	0.75	0.75	0.75	0	1	0.75	0
PT	2014	0	1	1	0	1	0	0.75	0.75	0.75	0.75	0	1	0.75	0
PT	2015	0	1	1	0	1	0	0.75	0.75	0.75	0.75	0	1	0.75	0
PT	2016	0	1	1	0	1	0	0.75	0.75	0.75	0.75	0	1	0.75	0
PT	2017	0	1	1	0	1	0	0.75	0.75	0.75	0.75	0	1	0.75	0
PT	2018	0	1	1	0	1	0.5	0.75	1	1	1	0	1	0.75	0
PT	2019	0	1	1	0	1	0.5	0.75	1	1	1	0	1	0.75	0
PT	2020	0	1	1	0	1	0.5	0.75	1	1	1	0	1	0.75	0
RTRS	2012	0	0.75	0.75	0	0.75	0.5	0.75	0.75	0.75	0	0.5	0.75	0.5	0
RTRS	2013	0	0.75	0.75	0	0.75	0.5	0.75	0.75	0.75	0	0.5	0.75	0.5	0
RTRS	2014	0	0.75	0.75	0	0.75	0.5	0.75	0.75	0.75	0	0.5	0.75	0.5	0
RTRS	2015	0	0.75	0.75	0	0.75	0.5	0.75	0.75	0.75	0	0.5	0.75	0.5	0
RTRS	2016	0	0.75	0.75	0	0.75	0.5	0.75	0.75	0.375	0.375	0.5	0.75	0.5	0
RTRS	2017	0	0.75	0.75	0	0.75	0.5	0.75	0.75	0.375	0.375	0.5	0.75	0.5	0
RTRS	2018	0	0.75	0.75	0	0.75	0.5	0.75	0.75	0.375	0.375	0.5	0.75	0.5	0
RTRS	2019	0	0.75	0.75	0	0.75	0.5	0.75	0.75	0.375	0.375	0.5	0.75	0.5	0
RTRS	2020	0	0.75	0.75	0	0.75	0.5	0.75	0.75	0.375	0.375	0.5	0.75	0.5	0
BS	2012	0	0	1	1	1	0.5	1	1	0.75	0.75	0	0.75	0	0
BS	2013	0	0	1	1	1	0.5	1	1	0.75	0.75	0	0.75	0	0
BS	2014	0	0	1	1	1	0.5	1	0.75	0.75	0	0	1	0	0
BS	2015	0	0	1	1	1	0.5	1	0.75	0.75	0	0	1	0	0
BS	2016	0	0	1	1	1	0.5	1	0.75	0.75	0	0	1	0	0
BS	2017	0	0	1	1	1	0.5	1	0.75	0.75	0	0	1	0	0
BS	2018	0	0	1	1	1	1	1	0.75	0.75	0	0	1	0	0
BS	2019	0	0	1	1	1	1	1	0.75	0.75	0	0	1	0	0
BS	2020	0	0	1	1	1	1	1	0.75	0.75	0	0	1	0	0
AWS	2012	0	0	0.75	0	0	0.5	0	0	0.75	0.25	0.75	1	0	0
AWS	2013	0	0	0.75	0	0	0.5	0	0	0.75	0.25	0.75	1	0	0
AWS	2014	0	0	0.75	0	0	0.5	0	0	0.75	0.25	0.75	1	0	0
AWS	2015	0	0	0.75	0	0	0.5	0	0	0.75	0.25	0.75	1	0	0
AWS	2016	0	0	0.75	0	0	0.5	0	0	0.75	0.25	0.75	1	0	0
AWS	2017	0	0	0.75	0	0	0.5	0	0	0.75	0.25	0.75	1	0	0
AWS	2018	0	0	0.75	0	0	0.5	0	0	0.75	0.25	0.75	1	0	0
AWS	2019	0	0	0.75	0	0	0.5	0	0	0.75	0.25	0.75	1	0	0
AWS	2020	0	0	0.75	0	0	0.5	0	0	0.75	0.25	0.75	1	0	0
PU	2012	0	0	0	0	0	0	0	0	0	0	0	0	0	0
PU	2013	0	0	0	0	0	0	0	0	0	0	0	0	0	0
PU	2014	0.5	0.5	0	0	0	0	0	0	0.5	0.5	0.75	0.75	0	0
PU	2015	0.5	0.5	0	0	0	0	0	0	0.5	0.5	0.75	0.75	0	0
PU	2016	0.5	0.5	0	0	0	0	0	0	0.5	0.5	0.75	0.75	0	0
PU	2017	0.5	0.5	0	0	0	0	0	0	0.5	0.5	0.75	0.75	0	0
PU	2018	0.5	0.5	0	0	0	0	0	0	0.5	0.5	0.75	0.75	0	0
PU	2019	0.5	0.5	0	0	0	0	0	0	0.5	0.5	0.75	0.75	0	0
PU	2020	0.5	0.5	0	0	0	0	0	0	0.5	0.5	0.75	0.75	0	0
